# Supplementary material
Source: PubMed Central journal article supplement (PMC3473212)
Supplement: supp_en.2012-1721v1_Supplemental_Files_EN-12-1721.pdf [file supp_en.2012-1721v1_Supplemental_Files_EN-12-1721.pdf]

## Supplemental Figure 1

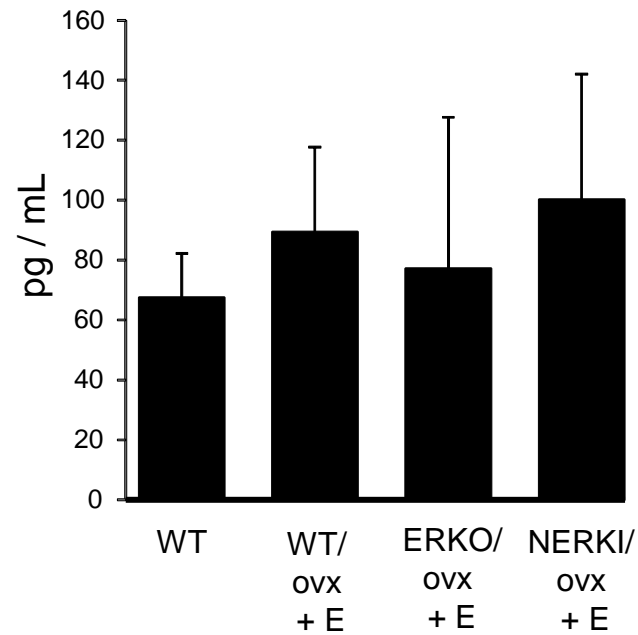

Supplemental Figure 1. Serum estradiol levels measured in a subset (n = 7-8 per group) of the experimental mice relative to WT control mice. Data are mean ± SEM.

Supplemental Table 1: Complete microarray dataset for genes commonly regulated in ERKO and NERKI bones (both relative to wildtype; WT). The p-value (p-val), q-value (q-val) and fold change (FC) are indicated along with the available information on description of the transcript with the RefSeq ID (when available).

| <u>Gene Symbol</u> | <u>Description</u>                              | <u>RefSeq ID</u> | <u>ERKO vs WT</u> |              |              | <u>NERKI vs WT</u> |              |              |
|--------------------|-------------------------------------------------|------------------|-------------------|--------------|--------------|--------------------|--------------|--------------|
|                    |                                                 |                  | <u>FC</u>         | <u>p-val</u> | <u>q-val</u> | <u>FC</u>          | <u>p-val</u> | <u>q-val</u> |
| 1500015O10Rik      | RIKEN cDNA 1500015O10 gene                      | NM_024283        | 1.86              | 0.0208       | 0.08245      | 2.89               | 0.001        | 0.0459       |
| 2010007H06Rik      | RIKEN cDNA 2010007H06 gene                      |                  | 1.80              | 0.0011       | 0.01974      | 1.66               | 0.0042       | 0.084        |
| 2510008P16Rik      |                                                 |                  | -1.87             | 0.0018       | 0.02523      | -1.78              | 0.0046       | 0.0876       |
| 2510042H12Rik      | RIKEN cDNA 2510042H12 gene                      |                  | 1.57              | 0.0022       | 0.02797      | 1.78               | 0.0005       | 0.0379       |
| 4833424O15Rik      | RIKEN cDNA 4833424O15 gene                      | NM_029425        | -3.27             | 0.0000       | 0.00286      | -3.32              | 0            | 0.0093       |
| 4933404M02Rik      | RIKEN cDNA 4933404M02 gene                      | NM_025744        | 2.81              | 0.0045       | 0.03901      | 2.86               | 0.0055       | 0.0961       |
| 4933411D12Rik      | RIKEN cDNA 4933411D12 gene                      |                  | 1.61              | 0.0002       | 0.00992      | 1.65               | 0.0002       | 0.0267       |
| 5430406J06Rik      | RIKEN cDNA 5430406J06 gene                      |                  | 1.95              | 0.0022       | 0.02799      | 1.87               | 0.0048       | 0.0897       |
| 5430417J04Rik      |                                                 |                  | -2.85             | 0.0018       | 0.02523      | -2.78              | 0.0031       | 0.0713       |
| 5430435G22Rik      | RIKEN cDNA 5430435G22 gene                      |                  | -1.56             | 0.0000       | 0.00355      | -1.66              | 0            | 0.0065       |
| A130047F11Rik      |                                                 |                  | 1.62              | 0.0045       | 0.03902      | 1.79               | 0.0017       | 0.0584       |
| A430070A22Rik      |                                                 |                  | 1.56              | 0.0062       | 0.04539      | 1.60               | 0.0062       | 0.0997       |
| A530024C08Rik      |                                                 |                  | 1.58              | 0.0024       | 0.02914      | 1.52               | 0.0062       | 0.0997       |
| A630034E16Rik      |                                                 |                  | 1.58              | 0.0004       | 0.0136       | 1.70               | 0.0002       | 0.025        |
| A630098G22Rik      |                                                 |                  | -1.59             | 0.0011       | 0.01988      | -1.64              | 0.001        | 0.0463       |
| A830055I09Rik      |                                                 |                  | 1.75              | 0.0001       | 0.00801      | 1.70               | 0.0003       | 0.0308       |
| A930004J17Rik      | RIKEN cDNA A930004J17 gene                      |                  | 2.05              | 0.0002       | 0.01056      | 1.74               | 0.0027       | 0.0682       |
| Adss               | Adenylosuccinate synthetase, non muscle         | NM_007422        | -2.07             | 0.0016       | 0.0242       | -2.07              | 0.0024       | 0.065        |
| Ahcy1              | S-adenosylhomocysteine hydrolase-like 1         | NM_145542        | -1.53             | 0.0000       | 0.00464      | -1.58              | 0            | 0.0106       |
| Al607873           | Expressed sequence Al607873                     |                  | -2.10             | 0.0005       | 0.01378      | -1.88              | 0.0023       | 0.0637       |
| AK157302           | CDNA sequence AK157302                          |                  | -1.97             | 0.0005       | 0.01475      | -1.85              | 0.0018       | 0.0595       |
| Aldh1a2            | Aldehyde dehydrogenase family 1, subfamily A2   | NM_009022        | -2.28             | 0.0000       | 0.00193      | -2.16              | 0            | 0.0087       |
| Alox15             | Arachidonate 15-lipoxygenase                    | NM_009660        | 1.65              | 0.0000       | 0.00257      | 1.51               | 0.0001       | 0.0187       |
| Ambp               | Alpha 1 microglobulin/bikunin                   | NM_007443        | -1.98             | 0.0026       | 0.02972      | -2.07              | 0.0024       | 0.065        |
| Angpt4             | Angiopietin 4                                   | NM_009641        | -2.12             | 0.0003       | 0.01183      | -2.10              | 0.0006       | 0.0381       |
| Atp6a1             | ATPase, H+ transporting, lysosomal V1 subunit A | NM_001690        | -1.85             | 0.0002       | 0.00986      | -1.71              | 0.001        | 0.0463       |
| B130064I06Rik      |                                                 |                  | 1.55              | 0.0009       | 0.01877      | 1.58               | 0.001        | 0.0459       |
| B230208H17Rik      | RIKEN cDNA B230208H17 gene                      | NM_001024616     | 1.58              | 0.0007       | 0.01622      | 1.60               | 0.0008       | 0.0438       |

|               |                                                              |              |       |        |         |       |        |        |
|---------------|--------------------------------------------------------------|--------------|-------|--------|---------|-------|--------|--------|
| B930036M14Rik |                                                              |              | 1.59  | 0.0024 | 0.02901 | 1.60  | 0.003  | 0.0711 |
| Bach2         | BTB and CNC homology 2                                       | NM_001109661 | 3.54  | 0.0000 | 0.00242 | 2.68  | 0.0001 | 0.0216 |
| Blk           | B lymphoid kinase                                            | NM_007549    | 1.89  | 0.0000 | 0.00468 | 1.54  | 0.0014 | 0.0514 |
| C330006D17Rik | RIKEN cDNA C330006D17 gene                                   |              | 1.55  | 0.0009 | 0.01844 | 1.50  | 0.0023 | 0.0637 |
| C330021F23Rik | RIKEN cDNA C330021F23 gene                                   | NM_001024728 | 2.63  | 0.0009 | 0.01794 | 2.61  | 0.0014 | 0.0515 |
| C430014G13Rik |                                                              |              | 2.11  | 0.0000 | 0.00227 | 2.24  | 0      | 0.0048 |
| C4a           | complement component 4A (Rodgers blood group)                | NM_011413    | -1.85 | 0.0001 | 0.00642 | -1.67 | 0.0005 | 0.0381 |
| C730026O12Rik |                                                              |              | 1.70  | 0.0039 | 0.03644 | 1.70  | 0.0055 | 0.096  |
| Capn2         | Calpain 2                                                    | NM_009794    | -1.94 | 0.0002 | 0.00908 | -1.68 | 0.0018 | 0.0595 |
| Capza1        | Capping protein (actin filament) muscle Z-line, alpha 1      | NM_009797    | -1.88 | 0.0005 | 0.01446 | -1.71 | 0.0024 | 0.0653 |
| Casq1         | Calsequestrin 1                                              | NM_009813    | -1.74 | 0.0001 | 0.00771 | -1.61 | 0.0007 | 0.0405 |
| Ccdc3         | Coiled-coil domain containing 3                              | NM_028804    | 2.17  | 0.0017 | 0.02512 | 2.75  | 0.0003 | 0.0308 |
| Cd19          | CD19 antigen                                                 | NM_009844    | 1.99  | 0.0000 | 0.00193 | 1.65  | 0.0001 | 0.0202 |
| Cd300lg       | CD300 antigen like family member G                           | NM_001160711 | 1.58  | 0.0031 | 0.0329  | 1.57  | 0.0046 | 0.0878 |
| Cd72          | CD72 antigen                                                 | NM_001110320 | 2.00  | 0.0000 | 0.00401 | 1.87  | 0.0001 | 0.0187 |
| Ch25h         | Cholesterol 25-hydroxylase                                   | NM_009890    | -1.58 | 0.0002 | 0.00895 | -1.56 | 0.0003 | 0.0308 |
| Chst3         | Carbohydrate (chondroitin 6/keratan) sulfotransferase 3      |              | 2.11  | 0.0000 | 0.0048  | 1.68  | 0.0013 | 0.0508 |
| Col2a1        | Collagen, type II, alpha 1                                   | NM_001113515 | -3.96 | 0.0001 | 0.00649 | -4.02 | 0.0001 | 0.0193 |
| Col8a1        | Collagen, type VIII, alpha 1                                 | NM_007739    | -3.93 | 0.0000 | 0.00435 | -3.23 | 0.0002 | 0.0236 |
| Cpa3          | Carboxypeptidase A3, mast cell                               | NM_007753    | 1.58  | 0.0001 | 0.00607 | 1.65  | 0      | 0.0132 |
| Cpm           | Carboxypeptidase M                                           | NM_027468    | 2.35  | 0.0001 | 0.00642 | 1.88  | 0.0014 | 0.052  |
| Csf1r         | Colony stimulating factor 1 receptor                         | NM_001037859 | -2.08 | 0.0002 | 0.00918 | -1.90 | 0.0008 | 0.0436 |
| Cyp2e1        | Cytochrome P450, family 2, subfamily e, polypeptide 1        | NM_021282    | -2.55 | 0.0018 | 0.02519 | -2.65 | 0.0019 | 0.0612 |
| D030069G17Rik |                                                              |              | 1.62  | 0.0022 | 0.02774 | 1.58  | 0.0043 | 0.0853 |
| D130032J17Rik |                                                              |              | 2.13  | 0.0032 | 0.03329 | 2.08  | 0.0056 | 0.0966 |
| D230047F17Rik |                                                              |              | 1.95  | 0.0001 | 0.00607 | 1.80  | 0.0003 | 0.0304 |
| D6Mit97       | DNA segment, Chr 6, Massachusetts Institute of Technology 97 |              | -3.05 | 0.0007 | 0.01665 | -2.65 | 0.0029 | 0.0693 |
| Dnm3os        | Dynamin 3, opposite strand                                   |              | 1.75  | 0.0028 | 0.03108 | 1.86  | 0.0019 | 0.0621 |
| E330018D03Rik | RIKEN cDNA E330018D03 gene                                   |              | 1.53  | 0.0012 | 0.02108 | 1.62  | 0.0006 | 0.0392 |

|                                             |                                                             |              |       |        |         |       |        |        |
|---------------------------------------------|-------------------------------------------------------------|--------------|-------|--------|---------|-------|--------|--------|
| E330019D12Rik                               |                                                             |              | 1.53  | 0.0073 | 0.04894 | 1.71  | 0.0021 | 0.0629 |
| Ear10                                       | Eosinophil-associated, ribonuclease A family, member 10     | NM_053112    | 2.86  | 0.0003 | 0.01059 | 2.54  | 0.001  | 0.0463 |
| Ear12                                       | Eosinophil-associated, ribonuclease A family, member 12     | NM_001012766 | 3.04  | 0.0005 | 0.01441 | 2.57  | 0.0025 | 0.0661 |
| Ear2                                        | Eosinophil-associated, ribonuclease A family, member 2      | NM_007895    | 4.02  | 0.0007 | 0.01652 | 3.44  | 0.0025 | 0.0655 |
| Ear3                                        |                                                             | NM_017388    | 3.33  | 0.0002 | 0.00959 | 3.01  | 0.0006 | 0.039  |
| Ear6                                        | Eosinophil-associated, ribonuclease A family, member 6      | NM_053111    | 5.23  | 0.0018 | 0.02548 | 4.42  | 0.0053 | 0.0943 |
| Eef2                                        | Eukaryotic translation elongation factor 2                  | NM_007907    | -1.99 | 0.0023 | 0.02841 | -1.94 | 0.0042 | 0.0831 |
| Epx                                         | Eosinophil peroxidase                                       | NM_007946    | 4.00  | 0.0009 | 0.01877 | 3.35  | 0.0036 | 0.0779 |
| Evx1                                        | Even skipped homeotic gene 1 homolog                        | NM_007966    | -1.57 | 0.0001 | 0.00649 | -1.51 | 0.0003 | 0.0304 |
| F730045P10Rik                               |                                                             |              | 2.07  | 0.0000 | 0.00033 | 1.53  | 0.0001 | 0.0151 |
| F830002E14Rik                               |                                                             |              | -2.56 | 0.0002 | 0.00892 | -2.37 | 0.0005 | 0.0376 |
| Fcrls                                       |                                                             | NM_030707    | -4.31 | 0.0000 | 0.00197 | -3.45 | 0      | 0.0124 |
| Fn1                                         | Fibronectin 1                                               | NM_010233    | -2.49 | 0.0003 | 0.01059 | -2.38 | 0.0006 | 0.0389 |
| Gdf3                                        | Growth differentiation factor 3                             | NM_008108    | -2.47 | 0.0000 | 0.00197 | -2.58 | 0      | 0.0048 |
| Gdpd2                                       | Glycerophosphodiester phosphodiesterase domain containing 2 | NM_023608    | -2.36 | 0.0001 | 0.00744 | -2.05 | 0.0007 | 0.0414 |
| Gpr88                                       | G-protein coupled receptor 88                               | NM_022427    | 1.94  | 0.0000 | 0.00401 | 1.73  | 0.0002 | 0.0248 |
| Greb1                                       | Gene regulated by estrogen in breast cancer protein         | NM_001252071 | -2.02 | 0.0000 | 0.00193 | -2.09 | 0      | 0.0048 |
| Grn                                         | Granulin                                                    | NM_008175    | -1.51 | 0.0001 | 0.00664 | -1.51 | 0.0001 | 0.0202 |
| Gsn                                         | Gelsolin                                                    |              | -1.69 | 0.0001 | 0.00771 | -1.75 | 0.0001 | 0.0193 |
| Hnrpk                                       | Heterogeneous nuclear ribonucleoprotein K                   |              | -1.61 | 0.0020 | 0.02637 | -1.55 | 0.0046 | 0.088  |
| lbsp                                        | Integrin binding sialoprotein                               | NM_008318    | -3.33 | 0.0000 | 0.00359 | -2.79 | 0.0001 | 0.0203 |
| Id4                                         | Inhibitor of DNA binding 4                                  | NM_031166    | -1.51 | 0.0010 | 0.01902 | -1.54 | 0.001  | 0.0459 |
| IGHV10S3_AF064446_Ig_heavy_variable_10S3_9  |                                                             |              | -2.88 | 0.0008 | 0.01752 | -3.14 | 0.0007 | 0.0398 |
| Igh-V11                                     | Immunoglobulin heavy chain (V11 family)                     |              | -2.17 | 0.0002 | 0.00998 | -1.92 | 0.0013 | 0.0508 |
| IGHV12S1_M22439_Ig_heavy_variable_12S1_339  |                                                             |              | -2.03 | 0.0003 | 0.01059 | -1.86 | 0.0011 | 0.0481 |
| IGHV1S119_L33961_Ig_heavy_variable_1S119_14 |                                                             |              | -4.04 | 0.0002 | 0.00892 | -3.66 | 0.0005 | 0.0376 |

|                                                     |                                                                   |              |       |        |         |       |        |        |
|-----------------------------------------------------|-------------------------------------------------------------------|--------------|-------|--------|---------|-------|--------|--------|
| IGHV1S120_AF025443_Ig_heavy_variable_1S120_8        |                                                                   |              | -4.72 | 0.0005 | 0.0139  | -4.89 | 0.0006 | 0.0389 |
| IGHV1S124_AF025449_Ig_heavy_variable_1S124_11       |                                                                   |              | -2.68 | 0.0025 | 0.0295  | -2.82 | 0.0026 | 0.0662 |
| IGHV1S135_AF304556_Ig_heavy_variable_1S135_43       |                                                                   |              | -2.00 | 0.0023 | 0.02841 | -2.06 | 0.0024 | 0.0653 |
| IGHV1S14_K00707\$X00161_Ig_heavy_variable_1S14_164  |                                                                   |              | -1.69 | 0.0000 | 0.00401 | -1.69 | 0      | 0.0123 |
| IGHV1S28_X02460_Ig_heavy_variable_1S28_13           |                                                                   |              | -2.78 | 0.0004 | 0.0126  | -2.52 | 0.0013 | 0.0508 |
| IGHV1S30_X02462_Ig_heavy_variable_1S30_12           |                                                                   |              | -2.63 | 0.0000 | 0.00489 | -2.92 | 0      | 0.0106 |
| IGHV1S31_X02463_Ig_heavy_variable_1S31_40           |                                                                   |              | -2.52 | 0.0003 | 0.01068 | -2.62 | 0.0003 | 0.0304 |
| IGHV1S34_X02467_Ig_heavy_variable_1S34_71           |                                                                   |              | -2.36 | 0.0002 | 0.00986 | -2.19 | 0.0007 | 0.0405 |
| IGHV1S35_M12376_Ig_heavy_variable_1S35_13           |                                                                   |              | -4.39 | 0.0008 | 0.01739 | -4.80 | 0.0008 | 0.0422 |
| IGHV1S36_M13788_Ig_heavy_variable_1S36_40           |                                                                   |              | -3.90 | 0.0005 | 0.01406 | -4.27 | 0.0004 | 0.0374 |
| IGHV1S59_L17134_Ig_heavy_variable_1S59_150          |                                                                   |              | -1.55 | 0.0013 | 0.02227 | -1.51 | 0.0031 | 0.0714 |
| IGHV5S18_AF290972_Ig_heavy_variable_5S18_125        |                                                                   |              | -1.61 | 0.0017 | 0.02454 | -1.62 | 0.0022 | 0.0637 |
| IGHV8S6_U23021_Ig_heavy_variable_8S6_61             |                                                                   |              | -3.34 | 0.0002 | 0.01056 | -3.23 | 0.0005 | 0.0376 |
| IGHV8S7_U23022_Ig_heavy_variable_8S7_163            |                                                                   |              | -4.58 | 0.0001 | 0.0083  | -3.81 | 0.0006 | 0.0398 |
| IGKV2-137_AJ231263_Ig_kappa_variable_2-137_15       |                                                                   |              | -3.66 | 0.0003 | 0.01141 | -3.59 | 0.0005 | 0.0379 |
| IGKV9-120_V00804\$J00566_Ig_kappa_variable_9-120_12 |                                                                   |              | -2.83 | 0.0161 | 0.07265 | -4.22 | 0.0031 | 0.0725 |
| Il8ra                                               | Interleukin 8 receptor, alpha                                     |              | -1.86 | 0.0001 | 0.00642 | -1.89 | 0.0001 | 0.0187 |
| Irf4                                                | Interferon regulatory factor 4                                    | NM_013674    | 2.00  | 0.0000 | 0.00278 | 1.56  | 0.0009 | 0.0443 |
| Irx3                                                | Iroquois related homeobox 3 (Drosophila)                          | NM_001253822 | -1.75 | 0.0019 | 0.02573 | -1.94 | 0.0008 | 0.043  |
| Itn2a                                               | Integral membrane protein 2A                                      | NM_008409    | -1.80 | 0.0006 | 0.01521 | -1.72 | 0.0016 | 0.056  |
| Jaknip1                                             | Janus kinase and microtubule interacting protein 1                | NM_178394    | 2.21  | 0.0000 | 0.00563 | 1.60  | 0.0049 | 0.0899 |
| Kcnc4                                               | Potassium voltage gated channel, Shaw-related subfamily, member 4 |              | 2.01  | 0.0119 | 0.06146 | 2.65  | 0.0021 | 0.0629 |
| Kcnk1                                               | Potassium channel, subfamily K, member 1                          | NM_008430    | -1.86 | 0.0050 | 0.04117 | -1.95 | 0.0043 | 0.085  |

|              |                                                                |              |       |        |         |       |        |        |
|--------------|----------------------------------------------------------------|--------------|-------|--------|---------|-------|--------|--------|
| Kng1         | Kininogen 1                                                    | NM_001102411 | -2.10 | 0.0003 | 0.01177 | -1.79 | 0.003  | 0.0713 |
| Kpna2        | Karyopherin (importin) alpha 2                                 | NM_010655    | -2.01 | 0.0007 | 0.01626 | -1.89 | 0.002  | 0.0622 |
| Lgi2         | Leucine-rich repeat LGI family, member 2                       | NM_144945    | -1.87 | 0.0003 | 0.01156 | -1.85 | 0.0005 | 0.0381 |
| Lifr         | Leukemia inhibitory factor receptor                            | NM_001113386 | -1.94 | 0.0001 | 0.00763 | -1.77 | 0.0006 | 0.039  |
| Limch1       | LIM and calponin homology domains 1                            | NM_001001980 | 1.91  | 0.0003 | 0.01185 | 1.65  | 0.0034 | 0.0756 |
| LOC100043991 | similar to Immunoglobulin heavy chain                          |              | -1.70 | 0.0028 | 0.03101 | -1.73 | 0.0032 | 0.073  |
| LOC100044696 | similar to cysteine-rich PAK1inhibitor                         |              | -1.73 | 0.0038 | 0.03557 | -1.73 | 0.0054 | 0.0951 |
| LOC100046136 | hypothetical protein LOC100046136                              |              | -1.64 | 0.0010 | 0.01947 | -1.70 | 0.0008 | 0.0438 |
| LOC100046275 | ig heavy chain V-II region SESS-like                           |              | -2.09 | 0.0006 | 0.01569 | -2.14 | 0.0007 | 0.0415 |
| LOC100046320 | similar to Matrin 3                                            |              | -1.69 | 0.0006 | 0.01554 | -1.63 | 0.0016 | 0.0562 |
| LOC100046496 | Ig kappa V-region 24B-like                                     |              | -2.51 | 0.0008 | 0.01708 | -2.49 | 0.0012 | 0.0497 |
| LOC100046546 | similar to IgM (kappa)light-chain                              |              | -1.75 | 0.0056 | 0.04324 | -1.81 | 0.0052 | 0.0935 |
| LOC100047012 | similar to ubiquitin-conjugating enzyme UbcM2                  |              | -2.25 | 0.0013 | 0.02242 | -2.04 | 0.0047 | 0.0886 |
| LOC100047815 | similar to CD79A antigen (immunoglobulin-associated alpha)     |              | 2.80  | 0.0001 | 0.00607 | 1.93  | 0.0035 | 0.0768 |
| LOC100048461 | similar to dendritic cell-associated C-type lectin-1; DECTIN-1 |              | -1.52 | 0.0035 | 0.034   | -1.52 | 0.0049 | 0.09   |
| LOC100048770 | Ig heavy chain V region 108A-like                              |              | -3.45 | 0.0001 | 0.0083  | -3.80 | 0.0001 | 0.0193 |
| LOC232067    | similar to immunoglobulin light chain variable region          |              | -4.40 | 0.0039 | 0.03617 | -4.94 | 0.0033 | 0.0748 |
| LOC331102    | similar to 14-3-3 PROTEIN TAU (14-3-3 PROTEIN THETA)           |              | -2.92 | 0.0008 | 0.01739 | -2.83 | 0.0015 | 0.0537 |
| LOC380799    | similar to Igh-VJ558 protein                                   |              | -3.16 | 0.0004 | 0.0136  | -2.87 | 0.0013 | 0.0508 |
| LOC380801    | similar to VH283 protein                                       |              | -1.74 | 0.0012 | 0.02168 | -1.69 | 0.0026 | 0.0662 |
| LOC380805    | similar to idiotypic anti-NP IgG(1) heavy chain V-D-J          |              | -2.58 | 0.0032 | 0.03329 | -2.83 | 0.0025 | 0.0653 |
| LOC380862    |                                                                |              | 2.25  | 0.0015 | 0.02318 | 2.60  | 0.0006 | 0.0392 |
| LOC381285    |                                                                |              | -1.81 | 0.0005 | 0.01468 | -1.71 | 0.0017 | 0.0574 |
| LOC381739    | hypothetical LOC381739                                         |              | 1.84  | 0.0010 | 0.01942 | 1.66  | 0.0051 | 0.093  |
| LOC384538    | similar to serine/threonine kinase AIE1                        |              | 3.04  | 0.0002 | 0.00998 | 3.05  | 0.0003 | 0.0317 |
| LOC544904    | similar to Ig heavy chain V region 186-1 precursor             |              | -2.94 | 0.0019 | 0.02585 | -3.36 | 0.0012 | 0.0496 |
| LOC630242    | similar to Ig heavy chain V region MC101 precursor             |              | -2.08 | 0.0008 | 0.01736 | -2.06 | 0.0013 | 0.0508 |
| LOC630284    | similar to Ig heavy chain V region 5-84 precursor              |              | -1.82 | 0.0003 | 0.01117 | -1.75 | 0.0008 | 0.0429 |

|           |                                                                                                    |              |        |        |          |        |        |        |
|-----------|----------------------------------------------------------------------------------------------------|--------------|--------|--------|----------|--------|--------|--------|
| LOC630337 | similar to Ig heavy chain V region 1B43 precursor                                                  |              | -3.37  | 0.0000 | 0.00519  | -3.30  | 0.0001 | 0.0179 |
| LOC637082 | similar to Traf2 binding protein                                                                   |              | 1.84   | 0.0000 | 0.00401  | 1.57   | 0.0005 | 0.0379 |
| LOC637337 | ig heavy chain V-III region VH26-like                                                              |              | -2.30  | 0.0023 | 0.02817  | -2.46  | 0.0019 | 0.061  |
| LOC637785 | Ig heavy chain V region 3-like                                                                     |              | -5.41  | 0.0004 | 0.01316  | -5.19  | 0.0008 | 0.0424 |
| LOC669660 | similar to PDZ and LIM domain protein 5 (Enigma homolog) (Enigma-like PDZ and LIM domains protein) |              | -2.20  | 0.0003 | 0.01059  | -1.85  | 0.0025 | 0.0661 |
| LOC674089 | similar to Ig heavy chain V region 345 precursor                                                   |              | -1.54  | 0.0086 | 0.05277  | -1.66  | 0.0042 | 0.084  |
| LOC674094 | similar to Ig heavy chain V region MC101 precursor                                                 |              | -1.66  | 0.0010 | 0.0196   | -1.66  | 0.0015 | 0.0544 |
| LOC674147 | similar to Ig heavy chain V-I region HG3 precursor                                                 |              | -1.64  | 0.0018 | 0.02519  | -1.59  | 0.0041 | 0.0821 |
| LOC677369 | hypothetical protein LOC677369                                                                     |              | -6.57  | 0.0000 | 0.00132  | -5.77  | 0      | 0.0048 |
| LOC677648 | Ig heavy chain V-II region SESS-like                                                               |              | -2.79  | 0.0001 | 0.00753  | -2.91  | 0.0001 | 0.0195 |
| Lpl       | Lipoprotein lipase                                                                                 | NM_008509    | 1.84   | 0.0015 | 0.02362  | 1.71   | 0.005  | 0.0911 |
| Lrp4      | Low density lipoprotein receptor-related protein 4                                                 | NM_001145857 | -1.57  | 0.0098 | 0.05592  | -1.81  | 0.0024 | 0.065  |
| Lrrc15    | Leucine rich repeat containing 15                                                                  | NM_028973    | 2.30   | 0.0251 | 0.08955  | 3.81   | 0.0021 | 0.0629 |
| Ly6d      | Lymphocyte antigen 6 complex, locus D                                                              | NM_010742    | 1.85   | 0.0004 | 0.01323  | 1.57   | 0.0058 | 0.0976 |
| Mcpt8     | Mast cell protease 8                                                                               | NM_008572    | 2.01   | 0.0031 | 0.03259  | 2.55   | 0.0005 | 0.0376 |
| Mdk       | Midkine                                                                                            | NM_001012335 | 2.12   | 0.0001 | 0.00753  | 2.31   | 0.0001 | 0.017  |
| Megf10    | Multiple EGF-like-domains 10                                                                       | NM_001001979 | 1.58   | 0.0050 | 0.0414   | 1.74   | 0.002  | 0.0623 |
| Mgl1      | Macrophage galactose N-acetyl-galactosamine specific lectin 1                                      |              | -1.74  | 0.0044 | 0.03879  | -1.95  | 0.0018 | 0.06   |
| Mgl2      | Macrophage galactose N-acetyl-galactosamine specific lectin 2                                      | NM_145137    | -3.18  | 0.0002 | 0.00959  | -2.91  | 0.0006 | 0.0389 |
| Mmd2      | Monocyte to macrophage differentiation-associated 2                                                | NM_175217    | -1.81  | 0.0001 | 0.00649  | -1.93  | 0.0001 | 0.0148 |
| Mt3       | Metallothionein 3                                                                                  | NM_013603    | -1.88  | 0.0016 | 0.0241   | -1.88  | 0.0022 | 0.0637 |
| Mup1      | Major urinary protein 1                                                                            | NM_001163010 | -3.91  | 0.0000 | 8.64E-06 | -3.88  | 0      | 0      |
| Mup2      | Major urinary protein 2                                                                            | NM_001045550 | -11.83 | 0.0000 | 5.81E-06 | -11.71 | 0      | 0      |
| Myl4      | Myosin, light polypeptide 4                                                                        | NM_010858    | 3.06   | 0.0003 | 0.01185  | 2.63   | 0.0015 | 0.0547 |
| Mylc2pl   | Myosin light chain 2, precursor lymphocyte-specific                                                |              | -3.77  | 0.0001 | 0.00602  | -3.51  | 0.0002 | 0.0216 |
| Ncoa4     | Nuclear receptor coactivator 4                                                                     | NM_001033988 | -1.90  | 0.0034 | 0.03383  | -1.89  | 0.005  | 0.0917 |

|                   |                                                                                          |              |       |        |         |       |        |        |
|-------------------|------------------------------------------------------------------------------------------|--------------|-------|--------|---------|-------|--------|--------|
| Oasl2             | 2'-5' oligoadenylate synthetase-like 2                                                   | NM_011854    | -2.08 | 0.0000 | 0.00464 | -1.57 | 0.0027 | 0.0676 |
| Olfm4             | Olfactomedin 4                                                                           |              | -3.09 | 0.0051 | 0.04144 | -3.32 | 0.0047 | 0.0883 |
| Panx3             | Pannexin 3                                                                               | NM_172454    | -5.48 | 0.0000 | 0.00242 | -5.93 | 0      | 0.0074 |
| Papd4             | PAP associated domain containing 4                                                       | NM_133905    | -1.62 | 0.0005 | 0.01406 | -1.51 | 0.0023 | 0.0641 |
| Pappa             | Pregnancy-associated plasma protein A                                                    | NM_021362    | 1.76  | 0.0010 | 0.0196  | 1.71  | 0.0023 | 0.0637 |
| Pdap1             | PDGFA associated protein 1                                                               | NM_001033313 | 1.76  | 0.0002 | 0.00959 | 1.60  | 0.0014 | 0.052  |
| Phospho1          | Phosphatase, orphan 1                                                                    | NM_153104    | -1.96 | 0.0006 | 0.01554 | -1.71 | 0.0045 | 0.0867 |
| Ppp1cb            | Protein phosphatase 1, catalytic subunit, beta isoform                                   | NM_172707    | -2.83 | 0.0012 | 0.02137 | -2.39 | 0.0058 | 0.0974 |
| Ppp1r12a          | Protein phosphatase 1, regulatory (inhibitor) subunit 12A                                | NM_027892    | 1.51  | 0.0001 | 0.00642 | 1.52  | 0.0001 | 0.0193 |
| Prss34            | Protease, serine, 34                                                                     | NM_178372    | 1.64  | 0.0144 | 0.06849 | 2.17  | 0.0011 | 0.0475 |
| Psmb8             | Proteasome (prosome, macropain) subunit, beta type 8 (large multifunctional peptidase 7) | NM_010724    | -3.26 | 0.0021 | 0.02694 | -2.88 | 0.0061 | 0.0997 |
| Rag1              | Recombination activating gene 1                                                          | NM_009019    | 2.77  | 0.0000 | 0.00197 | 1.75  | 0.0016 | 0.0563 |
| Ranbp3l           | RAN binding protein 3-like                                                               | NM_198024    | 1.92  | 0.0003 | 0.01076 | 1.74  | 0.0015 | 0.0544 |
| Rbbp7             | Retinoblastoma binding protein 7                                                         |              | -2.06 | 0.0001 | 0.00602 | -2.09 | 0.0001 | 0.0178 |
| Rerg              | RAS-like, estrogen-regulated, growth-inhibitor                                           | NM_001164212 | -1.87 | 0.0048 | 0.04005 | -2.23 | 0.0012 | 0.0496 |
| Saps1             | SAPS domain family, member 1                                                             |              | 1.56  | 0.0000 | 0.00181 | 1.65  | 0      | 0.003  |
| scl0001487.1_50   |                                                                                          |              | -1.73 | 0.0004 | 0.01269 | -1.78 | 0.0004 | 0.0357 |
| scl0002547.1_9    |                                                                                          |              | 1.55  | 0.0051 | 0.04164 | 1.61  | 0.0039 | 0.0816 |
| scl0002975.1_346  |                                                                                          |              | 2.20  | 0.0003 | 0.01059 | 2.32  | 0.0002 | 0.0274 |
| scl0003476.1_2802 |                                                                                          |              | 1.85  | 0.0000 | 0.00311 | 1.57  | 0.0004 | 0.0345 |
| Sdc3              | Syndecan 3                                                                               | NM_011520    | -1.52 | 0.0019 | 0.02548 | -1.54 | 0.0023 | 0.0637 |
| Serpinf1          | Serine (or cysteine) peptidase inhibitor, clade F, member 1                              | NM_011340    | 1.90  | 0.0020 | 0.02665 | 1.94  | 0.0023 | 0.0637 |
| Sfrp2             | Secreted frizzled-related protein 2                                                      | NM_009144    | -1.92 | 0.0014 | 0.02263 | -2.07 | 0.0009 | 0.0448 |
| Shox2             | Short stature homeobox 2                                                                 | NM_013665    | -1.57 | 0.0005 | 0.01455 | -1.55 | 0.0011 | 0.0471 |
| Siglec1           | Sialic acid binding Ig-like lectin 1, sialoadhesin                                       | NM_011426    | -1.61 | 0.0005 | 0.0139  | -1.55 | 0.0013 | 0.0508 |
| Siglecg           | Sialic acid binding Ig-like lectin G                                                     | NM_172900    | 1.65  | 0.0008 | 0.01785 | 1.52  | 0.0044 | 0.0866 |
| Sirpb1            | Signal-regulatory protein beta 1                                                         |              | -1.61 | 0.0054 | 0.04286 | -1.74 | 0.0026 | 0.067  |
| Snx30             | Sorting nexin family member 30                                                           | NM_172468    | 1.54  | 0.0036 | 0.03452 | 1.54  | 0.0049 | 0.0908 |
| Socs2             | Suppressor of cytokine signaling 2                                                       |              | -2.25 | 0.0000 | 0.0047  | -1.87 | 0.0005 | 0.0379 |



|          |                                                                    |              |       |        |         |       |        |        |
|----------|--------------------------------------------------------------------|--------------|-------|--------|---------|-------|--------|--------|
| Socs3    | Suppressor of cytokine signaling 3                                 | NM_007707    | -1.69 | 0.0001 | 0.00757 | -1.52 | 0.0011 | 0.0486 |
| Sox4     | SRY-box containing gene 4                                          | NM_009238    | 2.14  | 0.0000 | 0.00538 | 1.84  | 0.0005 | 0.0376 |
| Sox9     | SRY-box containing gene 9                                          | NM_011448    | 2.15  | 0.0007 | 0.01662 | 1.82  | 0.0058 | 0.0983 |
| St3gal5  | ST3 beta-galactoside alpha-2,3-sialyltransferase 5                 | NM_001035228 | 1.57  | 0.0002 | 0.00858 | 1.65  | 0.0001 | 0.0187 |
| Syng2    | Synaptogyrin 2                                                     | NM_009304    | -2.06 | 0.0011 | 0.01988 | -1.84 | 0.005  | 0.0916 |
| Thbs1    | Thrombospondin 1                                                   | NM_011580    | -1.74 | 0.0009 | 0.01859 | -1.69 | 0.0019 | 0.061  |
| Tmed2    | Transmembrane emp24 domain trafficking protein 2                   | NM_019770    | -2.36 | 0.0001 | 0.00642 | -2.26 | 0.0002 | 0.0236 |
| Tmed7    | Transmembrane emp24 protein transport domain containing 7          | NM_025698    | -1.80 | 0.0002 | 0.00895 | -1.84 | 0.0002 | 0.0247 |
| Tmem38b  | Transmembrane protein 38B                                          | NM_028053    | -1.52 | 0.0052 | 0.04223 | -1.61 | 0.003  | 0.0709 |
| Tmem86a  | Transmembrane protein 86A                                          | NM_026436    | -3.43 | 0.0000 | 0.00181 | -3.09 | 0      | 0.0079 |
| Tnfrsf1a | Tumor necrosis factor receptor superfamily, member 1a              | NM_011609    | -1.82 | 0.0013 | 0.02247 | -1.70 | 0.0046 | 0.0875 |
| Tpm3     | Tropomyosin 3, gamma                                               | NM_001253738 | -2.49 | 0.0008 | 0.01762 | -2.06 | 0.006  | 0.0992 |
| Trpc6    | Transient receptor potential cation channel, subfamily C, member 6 | NM_013838    | -1.57 | 0.0002 | 0.00983 | -1.58 | 0.0003 | 0.0304 |
| Tsc22d1  | TSC22 domain family, member 1                                      | NM_001177751 | -3.85 | 0.0001 | 0.00649 | -3.93 | 0.0001 | 0.0193 |
| Tspan3   | Tetraspanin 3                                                      | NM_019793    | -2.27 | 0.0000 | 0.00341 | -2.19 | 0      | 0.0131 |
| Ube2v1   | Ubiquitin-conjugating enzyme E2 variant 1                          | NM_023230    | -1.74 | 0.0015 | 0.02348 | -1.60 | 0.0059 | 0.099  |
| Vit      | Vitrin                                                             | NM_001197028 | 1.79  | 0.0009 | 0.01785 | 1.67  | 0.003  | 0.0713 |
| Vpreb1   | Pre-B lymphocyte gene 1                                            | NM_016982    | 2.10  | 0.0002 | 0.0095  | 1.83  | 0.0015 | 0.0529 |
| Vpreb3   | Pre-B lymphocyte gene 3                                            | NM_009514    | 3.91  | 0.0000 | 0.00128 | 2.77  | 0      | 0.012  |
| Wisp2    | WNT1 inducible signaling pathway protein 2                         | NM_016873    | -4.36 | 0.0000 | 0.0011  | -2.87 | 0      | 0.012  |
| Zubr1    |                                                                    |              | 1.71  | 0.0005 | 0.01406 | 1.60  | 0.0019 | 0.061  |

Supplemental Table 2: Complete microarray dataset for genes regulated in NERKI bones (relative to wildtype; WT). The p-value (p-val), q-value (q-val) and fold change (FC) are indicated along with the available information on description of the transcript with the RefSeq ID (when available).

| <u>Illumina Search Key</u> | <u>Gene Symbol</u> | <u>Description</u>                | <u>RefSeq ID</u>                                          | <u>FC</u> | <u>p-val</u> | <u>q-val</u> |
|----------------------------|--------------------|-----------------------------------|-----------------------------------------------------------|-----------|--------------|--------------|
| ILMN_193252                | 0610037M15Rik      |                                   |                                                           | -2.24     | 0.0002       | 0.0267       |
| ILMN_196382                | 1100001F19Rik      |                                   |                                                           | -2.28     | 0.0061       | 0.0997       |
| ILMN_204598                | 1300006C19Rik      |                                   |                                                           | -1.72     | 0.0009       | 0.0451       |
| ILMN_186408                | 2010001H16Rik      | RIKEN cDNA<br>2010001H16 gene     |                                                           | -1.61     | 0.0021       | 0.0629       |
| ILMN_218953                | 2310005G13Rik      | RIKEN cDNA<br>2310005G13 gene     | NM_183281                                                 | -1.81     | 0.0014       | 0.0523       |
| ILMN_220011                | 2410019A14Rik      | RIKEN cDNA<br>2410019A14 gene     | NM_001081094                                              | -1.51     | 0.002        | 0.0622       |
| ILMN_201765                | 2500004H21Rik      |                                   |                                                           | 1.52      | 0.0038       | 0.0807       |
| ILMN_193245                | 4632427E13Rik      | RIKEN cDNA<br>4632427E13 gene     |                                                           | 1.52      | 0            | 0.012        |
| ILMN_205813                | 4833425P12Rik      |                                   |                                                           | 1.55      | 0.0001       | 0.0171       |
| ILMN_189952                | 4930445K14Rik      | RIKEN cDNA<br>4930445K14 gene     |                                                           | 1.68      | 0.0001       | 0.0165       |
| ILMN_220780                | 4930513E20Rik      | RIKEN cDNA<br>4930513E20 gene     |                                                           | 1.55      | 0.0038       | 0.0807       |
| ILMN_184143                | 5530400B01Rik      | RIKEN cDNA<br>5530400B01 gene     |                                                           | 1.64      | 0.0033       | 0.0751       |
| ILMN_218048                | 6430510M02Rik      | RIKEN cDNA<br>6430510M02 gene     | NM_176932                                                 | 1.64      | 0.0005       | 0.0376       |
| ILMN_204800                | 6430573H23Rik      |                                   |                                                           | 1.73      | 0.0061       | 0.0997       |
| ILMN_191889                | 8030474H12Rik      | RIKEN cDNA<br>8030474H12 gene     |                                                           | 1.50      | 0.0001       | 0.0193       |
| ILMN_206918                | A430096A09Rik      |                                   |                                                           | 1.54      | 0.0001       | 0.0178       |
| ILMN_222725                | B230380D07Rik      | RIKEN cDNA<br>B230380D07 gene     | NM_172772                                                 | 1.68      | 0.0013       | 0.0508       |
| ILMN_204740                | B930037B01Rik      |                                   |                                                           | 1.58      | 0.0038       | 0.0806       |
| ILMN_212436                | BC030863           | cDNA sequence<br>BC030863         |                                                           | 1.50      | 0.0006       | 0.0384       |
| ILMN_192092                | C030002B11Rik      | RIKEN cDNA<br>C030002B11 gene     |                                                           | -1.51     | 0.0005       | 0.0381       |
| ILMN_191384                | C030014K22Rik      | RIKEN cDNA<br>C030014K22 gene     | NM_175461                                                 | -1.92     | 0            | 0.0074       |
| ILMN_210294                | C130067A03Rik      |                                   |                                                           | 1.57      | 0.0038       | 0.0807       |
| ILMN_209356                | Cldn10             | Claudin 10                        | NM_021386<br>NM_023878                                    | 2.49      | 0.0002       | 0.0216       |
| ILMN_188288                | D030017L14Rik      |                                   |                                                           | 1.56      | 0.0022       | 0.0632       |
| ILMN_217188                | D0H4S114           | DNA segment,<br>human D4S114      | NM_001109988<br>NM_001109989<br>NM_001109990<br>NM_053078 | 2.05      | 0.0046       | 0.0876       |
| ILMN_222493                | D630048P19Rik      |                                   |                                                           | 1.54      | 0            | 0.0048       |
| ILMN_218073                | Dpysl3             | Dihydropyrimidinase-<br>like 3    | NM_009468                                                 | 1.81      | 0.0016       | 0.0561       |
| ILMN_223889                | Drctnb1a           | Down-regulated by<br>Ctnnb1, a    | NM_053090                                                 | 1.67      | 0.004        | 0.0818       |
| ILMN_215523                | Dusp8              | Dual specificity<br>phosphatase 8 | NM_008748                                                 | 1.61      | 0.0043       | 0.0842       |
| ILMN_206779                | E030007N04Rik      |                                   |                                                           | 1.61      | 0.002        | 0.0623       |

|             |                                              |                                                                               |           |       |        |        |
|-------------|----------------------------------------------|-------------------------------------------------------------------------------|-----------|-------|--------|--------|
| ILMN_233946 | EG434858                                     |                                                                               |           | -3.47 | 0.0005 | 0.0376 |
| ILMN_210527 | EG633692                                     |                                                                               |           | -2.44 | 0.0036 | 0.0779 |
| ILMN_213378 | Hoxa5                                        | Homeo box A5                                                                  | NM_010453 | -1.55 | 0.0006 | 0.0381 |
| ILMN_203312 | HPBR114                                      |                                                                               |           | 1.57  | 0.0003 | 0.0308 |
| ILMN_184287 | IGHV10S1_AF064442_Ig_heavy_variable_10S1_100 |                                                                               |           | -1.67 | 0.0046 | 0.0879 |
| ILMN_216381 | Igk-V33                                      | Immunoglobulin kappa chain variable 33 (V33)                                  |           | -3.80 | 0.0021 | 0.0629 |
| ILMN_186543 | Igl-5                                        |                                                                               |           | 2.11  | 0.0004 | 0.0357 |
| ILMN_186467 | Igsf3                                        | Immunoglobulin superfamily, member 3                                          | NM_207205 | 1.84  | 0.0004 | 0.036  |
| ILMN_211329 | Kcnk2                                        | Potassium channel, subfamily K, member 2                                      | NM_010607 | -1.60 | 0.0057 | 0.0971 |
| ILMN_206227 | LOC100041569                                 |                                                                               |           | 1.76  | 0.0018 | 0.059  |
| ILMN_201525 | LOC100046393                                 | similar to Protein phosphatase 2, regulatory subunit B (B56), alpha           |           | -1.82 | 0.0039 | 0.0816 |
| ILMN_214618 | LOC100046918                                 | similar to Electron transferring flavoprotein, alpha polypeptide              |           | -3.69 | 0.0054 | 0.0949 |
| ILMN_223933 | LOC100048556                                 | similar to monocyte chemoattractant protein-5                                 |           | -2.62 | 0      | 0.0093 |
| ILMN_198435 | LOC209281                                    |                                                                               |           | -1.87 | 0.0028 | 0.0683 |
| ILMN_218449 | LOC238447                                    |                                                                               |           | -4.59 | 0.0001 | 0.0187 |
| ILMN_198486 | LOC269859                                    |                                                                               |           | -1.80 | 0.0005 | 0.0376 |
| ILMN_215850 | LOC333331                                    |                                                                               |           | -1.65 | 0.0001 | 0.0193 |
| ILMN_198427 | LOC381219                                    | hypothetical LOC381219                                                        |           | 1.53  | 0.0018 | 0.059  |
| ILMN_211083 | LOC383196                                    |                                                                               |           | -3.40 | 0.002  | 0.0623 |
| ILMN_199705 | LOC383850                                    |                                                                               |           | 1.55  | 0.003  | 0.0707 |
| ILMN_190076 | LOC432709                                    |                                                                               |           | -1.72 | 0.0003 | 0.0318 |
| ILMN_200478 | LOC545208                                    |                                                                               |           | -3.15 | 0      | 0.0106 |
| ILMN_234960 | LOC620807                                    |                                                                               |           | -3.81 | 0      | 0      |
| ILMN_190903 | LOC630347                                    |                                                                               |           | -1.57 | 0.0035 | 0.0775 |
| ILMN_196641 | LOC632684                                    | similar to La-related protein 4 (La ribonucleoprotein domain family member 4) |           | 1.55  | 0.0025 | 0.0655 |
| ILMN_193885 | LOC640696                                    | ig heavy chain V region 108A-like                                             |           | -2.42 | 0.001  | 0.0464 |
| ILMN_197393 | LOC667005                                    |                                                                               |           | -1.96 | 0.002  | 0.0622 |
| ILMN_211990 | LOC668549                                    |                                                                               |           | -2.03 | 0.0005 | 0.0376 |
| ILMN_212697 | LOC675759                                    | ig heavy chain V-III region J606-like                                         |           | -1.95 | 0.0007 | 0.0398 |
| ILMN_185836 | LOC676974                                    | glucose-6-phosphate isomerase-like                                            |           | -1.53 | 0.0028 | 0.0691 |
| ILMN_210701 | LOC677643                                    | ig heavy chain V region 3-like                                                |           | -5.24 | 0.0011 | 0.0475 |
| ILMN_212683 | Matn4                                        | Matrilin 4                                                                    | NM_013592 | 1.53  | 0.0011 | 0.0475 |

|             |                 |                                                             |                                                                                                                                           |       |        |        |
|-------------|-----------------|-------------------------------------------------------------|-------------------------------------------------------------------------------------------------------------------------------------------|-------|--------|--------|
| ILMN_210134 | Mgst3           | Microsomal glutathione S-transferase 3                      | NM_025569                                                                                                                                 | 1.54  | 0.0017 | 0.0575 |
| ILMN_211445 | Mmp8            | Matrix metalloproteinase 8                                  | NM_008611                                                                                                                                 | -1.54 | 0.0021 | 0.0629 |
| ILMN_212438 | Msr2            | Macrophage scavenger receptor 2                             | NM_030707                                                                                                                                 | -1.96 | 0.0001 | 0.0181 |
| ILMN_212812 | Nme7            | Non-metastatic cells 7, protein expressed in                | NM_138314<br>NM_178071                                                                                                                    | 1.69  | 0.0016 | 0.0551 |
| ILMN_205762 | P38ip-pending   |                                                             |                                                                                                                                           | 1.51  | 0.006  | 0.0992 |
| ILMN_219297 | Pnck            | Pregnancy upregulated non-ubiquitously expressed CaM kinase | NM_012040.2                                                                                                                               | 1.52  | 0.0008 | 0.0429 |
| ILMN_198467 | Prkg1           | Protein kinase, cGMP-dependent, type I                      | NM_001013833<br>NM_011160                                                                                                                 | 1.76  | 0.0026 | 0.0668 |
| ILMN_218286 | Slc25a39        | Solute carrier family 25, member 39                         |                                                                                                                                           | 1.52  | 0.0002 | 0.0247 |
| ILMN_215945 | Spon1           | Spondin 1, (f-spondin) extracellular matrix protein         | NM_145584                                                                                                                                 | 1.63  | 0.0034 | 0.076  |
| ILMN_240633 | Tnfsf12-tnfsf13 |                                                             |                                                                                                                                           | -1.50 | 0.0039 | 0.0812 |
| ILMN_214163 | Tprkb           | Tp53rk binding protein                                      | NM_176842                                                                                                                                 | 1.52  | 0      | 0.012  |
| ILMN_229647 | Whrn            | Whirlin                                                     | NM_001008791<br>NM_001008792<br>NM_001008793<br>NM_001008794<br>NM_001008795<br>NM_001008796<br>NM_001008797<br>NM_001008798<br>NM_028640 | -1.53 | 0.0029 | 0.0691 |

Supplemental Table 3: Complete microarray dataset for genes regulated in ERKO bones (relative to wildtype; WT). The p-value (p-val), q-value (q-val) and fold change (FC) are indicated along with the available information on description of the transcript with the RefSeq ID (when available).

| <b>Illumina Search Key</b> | <b>Gene Symbol</b> | <b>Description</b>                     | <b>RefSeq ID</b> | <b>p-val</b> | <b>q-val</b> | <b>FC</b> |
|----------------------------|--------------------|----------------------------------------|------------------|--------------|--------------|-----------|
| ILMN_184190                | Ifi27              | Interferon, alpha-inducible protein 27 | NM_029803        | 0.012679     | 0.0636446    | -1.73676  |
| ILMN_205627                | 1190012C08Rik      |                                        |                  | 0.0036069    | 0.0345365    | 1.56422   |
| ILMN_219204                | 1700030K09Rik      | RIKEN cDNA 1700030K09 gene             | NM_028170        | 0.0291171    | 0.0960102    | 1.70061   |
| ILMN_227745                | 1700109H08Rik      | RIKEN cDNA 1700109H08 gene             | NM_029843        | 0.0107516    | 0.0586125    | 1.59963   |
| ILMN_222236                | 1810013D10Rik      | RIKEN cDNA 1810013D10 gene             | NM_001145433     | 0.009242     | 0.0547814    | 1.56463   |
| ILMN_186537                | 2010004M13Rik      | RIKEN cDNA 2010004M13 gene             |                  | 0.0031851    | 0.0332701    | 1.56907   |
| ILMN_218797                | 2310046A06Rik      | RIKEN cDNA 2310046A06 gene             | NM_027150        | 0.0313743    | 0.099409     | -1.73735  |
| ILMN_218359                | 2410076I21Rik      | RIKEN cDNA 2410076I21 gene             | NM_028598        | 0.006555     | 0.0465791    | 1.63672   |
| ILMN_190342                | 2610319H10Rik      | RIKEN cDNA 2610319H10 gene             |                  | 0.0004926    | 0.014267     | 1.50889   |
| ILMN_189076                | 2810455B08Rik      | RIKEN cDNA 2810455B08 gene             |                  | 0.0085831    | 0.0527602    | 1.57154   |
| ILMN_203092                | 3830430K15Rik      |                                        |                  | 0.0263576    | 0.0916207    | -1.55569  |
| ILMN_203114                | 4930418I18Rik      |                                        |                  | 0.0277256    | 0.0939705    | 1.53416   |
| ILMN_202319                | 4930426D05Rik      | RIKEN cDNA 4930426D05 gene             |                  | 2.49E-05     | 0.0041369    | 1.78712   |
| ILMN_215095                | 4930519L02Rik      | RIKEN cDNA 4930519L02 gene             |                  | 0.0101958    | 0.0571315    | 1.66003   |
| ILMN_195320                | 4930533K18Rik      | RIKEN cDNA 4930533K18 gene             |                  | 0.00033      | 0.011848     | -2.01009  |
| ILMN_216350                | 4931429I11Rik      | RIKEN cDNA 4931429I11 gene             | NM_001081121     | 2.52E-06     | 0.0018118    | 2.18495   |
| ILMN_203384                | 4932410M19Rik      |                                        |                  | 0.0018546    | 0.0254843    | 1.50257   |
| ILMN_188842                | 5330403D14Rik      | RIKEN cDNA 5330403D14 gene             |                  | 0.0018677    | 0.0254843    | 1.81511   |
| ILMN_189730                | 5430434G16Rik      | RIKEN cDNA 5430434G16 gene             |                  | 0.0029312    | 0.0317629    | 1.57386   |
| ILMN_216779                | 5730437N04Rik      |                                        |                  | 0.0257661    | 0.0907105    | -2.31845  |
| ILMN_188077                | 5830427D02Rik      | RIKEN cDNA 5830427D02 gene             |                  | 0.0045235    | 0.0390671    | 1.60803   |
| ILMN_203520                | 5830496L11Rik      |                                        |                  | 0.0073087    | 0.0488619    | 1.73518   |
| ILMN_203009                | 5930437C20Rik      |                                        |                  | 0.0068426    | 0.0474756    | 1.59986   |
| ILMN_202862                | 6330403E01Rik      |                                        |                  | 0.010802     | 0.0587953    | 1.56216   |
| ILMN_187875                | 6330509M05Rik      | RIKEN cDNA 6330509M05 gene             |                  | 0.0020208    | 0.0264779    | 1.57028   |
| ILMN_203250                | 6430407L02Rik      |                                        |                  | 0.0085526    | 0.0526654    | 1.50496   |
| ILMN_203479                | 6430524C05Rik      |                                        |                  | 0.0074005    | 0.0492549    | 1.8238    |
| ILMN_203481                | 6430562A12Rik      |                                        |                  | 0.0125708    | 0.0634971    | 1.56794   |
| ILMN_188686                | 6720418B01Rik      | RIKEN cDNA 6720418B01 gene             |                  | 0.0026314    | 0.0301413    | 1.63151   |
| ILMN_207187                | 6820437F20Rik      |                                        |                  | 0.0237232    | 0.0874567    | 1.79009   |
| ILMN_192598                | 9430064K01Rik      | RIKEN cDNA 9430064K01 gene             |                  | 0.0012707    | 0.0219974    | -1.50722  |
| ILMN_204270                | 9530082I15Rik      |                                        |                  | 0.0118628    | 0.061458     | 1.52081   |
| ILMN_192234                | 9626100_15         |                                        |                  | 0.0161123    | 0.0726478    | 1.94824   |
| ILMN_187760                | 9626100_224        |                                        |                  | 0.0143739    | 0.0684973    | 2.24942   |
| ILMN_190851                | 9626958_317        |                                        |                  | 0.0094874    | 0.0553312    | 2.30437   |
| ILMN_205726                | 9830141J12Rik      |                                        |                  | 0.0145432    | 0.0687223    | 1.50079   |

|             |               |                                                                                              |              |           |           |          |
|-------------|---------------|----------------------------------------------------------------------------------------------|--------------|-----------|-----------|----------|
| ILMN_205725 | 9830141K10Rik |                                                                                              |              | 0.0040695 | 0.0372276 | 1.56964  |
| ILMN_202852 | A130004B21Rik |                                                                                              |              | 0.0189474 | 0.0786791 | 1.5845   |
| ILMN_204390 | A130017C09Rik |                                                                                              |              | 0.003474  | 0.0340595 | 1.63862  |
| ILMN_203926 | A130020K16Rik |                                                                                              |              | 6.35E-06  | 0.0022133 | 1.74225  |
| ILMN_203758 | A130026C10Rik |                                                                                              |              | 0.0136743 | 0.0663767 | 1.56375  |
| ILMN_195241 | A130038J17Rik | RIKEN cDNA A130038J17 gene                                                                   |              | 0.0265862 | 0.0920786 | 1.67789  |
| ILMN_204052 | A130039H09Rik |                                                                                              |              | 0.0003665 | 0.0124013 | 1.56359  |
| ILMN_202876 | A130052C08Rik |                                                                                              |              | 0.001302  | 0.0222805 | 1.55515  |
| ILMN_204872 | A130096D14Rik |                                                                                              |              | 0.0256394 | 0.0904777 | 1.51851  |
| ILMN_204870 | A230021I18Rik |                                                                                              |              | 0.0159605 | 0.0722125 | 1.57127  |
| ILMN_203950 | A430090G16Rik |                                                                                              |              | 0.0007107 | 0.0165214 | 1.50733  |
| ILMN_195915 | A430106G13Rik | RIKEN cDNA A430106G13 gene                                                                   |              | 0.0015653 | 0.0239988 | 1.96229  |
| ILMN_191455 | A430110M15Rik | RIKEN cDNA A430110M15 gene                                                                   |              | 0.00201   | 0.0263693 | 1.5087   |
| ILMN_205464 | A530065H22Rik |                                                                                              |              | 0.0275738 | 0.0937254 | -1.82274 |
| ILMN_204063 | A630072J24Rik |                                                                                              |              | 0.0168201 | 0.0740637 | 1.54018  |
| ILMN_205576 | A630076G18Rik |                                                                                              |              | 0.0069185 | 0.0476952 | 1.54721  |
| ILMN_204025 | A630097D09Rik |                                                                                              |              | 0.0097345 | 0.0558334 | 1.65423  |
| ILMN_204301 | A830091E24Rik |                                                                                              |              | 0.002458  | 0.0291721 | 1.64015  |
| ILMN_204252 | A830092P18Rik |                                                                                              |              | 0.0118175 | 0.0613829 | 1.53212  |
| ILMN_254698 | Acaa2         | Acetyl-Coenzyme A acyltransferase 2 (mitochondrial 3-oxoacyl-Coenzyme A thiolase)            | NM_177470    | 4.44E-05  | 0.0053797 | -1.61961 |
| ILMN_223620 | Adfp          | Adipose differentiation related protein                                                      |              | 0.0304376 | 0.0978739 | -1.54477 |
| ILMN_223121 | Adi1          | Acireductone dioxygenase 1                                                                   | NM_134052    | 0.0292083 | 0.0961254 | -1.60234 |
| ILMN_217418 | Agpat2        | 1-acylglycerol-3-phosphate O-acyltransferase 2 (lysophosphatidic acid acyltransferase, beta) | NM_026212    | 0.0128904 | 0.0641301 | -2.3309  |
| ILMN_221723 | Ahi1          | Abelson helper integration site                                                              |              | 0.01119   | 0.0598173 | 1.5346   |
| ILMN_206936 | Akap12        | A kinase (PRKA) anchor protein (gravin) 12                                                   | NM_031185    | 0.0024333 | 0.0291352 | 1.71485  |
| ILMN_241430 | Amica1        | Adhesion molecule, interacts with CXADR antigen 1                                            | NM_001005421 | 0.0039701 | 0.0367033 | 1.7058   |
| ILMN_217348 | Anp32b-ps1    | Bacidic (leucine-rich) nuclear phosphoprotein 32 family, member B, pseudogene 1              |              | 0.0138254 | 0.0668324 | -1.50953 |
| ILMN_216245 | Apod          | Apolipoprotein D                                                                             | NM_007470    | 0.0117389 | 0.0611851 | -1.65459 |
| ILMN_217368 | Apoe          | Apolipoprotein E                                                                             | NM_009696    | 0.0052018 | 0.0421583 | -1.75692 |
| ILMN_216978 | Arf5          | ADP-ribosylation factor 5                                                                    | NM_007480    | 0.0153492 | 0.0707321 | -2.19208 |
| ILMN_218774 | Arl2bp        | ADP-ribosylation factor-like 2 binding protein                                               |              | 0.0140907 | 0.0676768 | -1.71794 |
| ILMN_218211 | Arl5a         | ADP-ribosylation factor-like 5A                                                              | NM_182994    | 0.0112265 | 0.0599511 | -1.86754 |
| ILMN_218211 | Arl5a         | ADP-ribosylation factor-like 5A                                                              | NM_182994    | 0.0139207 | 0.0671688 | -1.85682 |

|             |               |                                                                               |              |           |           |          |
|-------------|---------------|-------------------------------------------------------------------------------|--------------|-----------|-----------|----------|
| ILMN_213701 | Arl6ip5       | ADP-ribosylation factor-like 6 interacting protein 5                          | NM_022992    | 0.0300955 | 0.0974539 | -1.72911 |
| ILMN_214532 | Aradc4        | Arrestin domain containing 4                                                  | NM_001042592 | 0.0024474 | 0.0291352 | -1.87593 |
| ILMN_218764 | Asprv1        | Aspartic peptidase, retroviral-like 1                                         | NM_026414    | 0.0100646 | 0.0568081 | -1.8922  |
| ILMN_223681 | Atp1b1        | ATPase, Na+/K+ transporting, beta 1 polypeptide                               | NM_009721    | 0.0284981 | 0.0950482 | 1.77646  |
| ILMN_201616 | Atp5f1        | ATP synthase, H+ transporting, mitochondrial F0 complex, subunit b, isoform 1 | NM_009725    | 0.0047242 | 0.0398677 | -2.47675 |
| ILMN_220358 | Atp6v1c1      | ATPase, H+ transporting, lysosomal V1 subunit C1                              | NM_025494    | 0.0088427 | 0.0535265 | -1.73388 |
| ILMN_222537 | Atp6v1g1      | ATPase, H+ transporting, lysosomal V1 subunit G1                              | NM_024173    | 0.0086101 | 0.052802  | -2.14761 |
| ILMN_204453 | B130008O17Rik |                                                                               |              | 0.008786  | 0.0534106 | 1.69604  |
| ILMN_203212 | B230205C01Rik |                                                                               |              | 0.0133904 | 0.0654568 | 1.58862  |
| ILMN_204511 | B230337C21Rik |                                                                               |              | 0.0037428 | 0.0355124 | 1.54717  |
| ILMN_204524 | B230363H02Rik |                                                                               |              | 0.0070053 | 0.0477834 | 1.53702  |
| ILMN_204535 | B230386D16Rik |                                                                               |              | 0.002831  | 0.0312901 | 1.5051   |
| ILMN_204525 | B230387C07Rik |                                                                               |              | 0.0004013 | 0.0129302 | 1.66774  |
| ILMN_216317 | B3gat2        | Beta-1,3-glucuronyltransferase 2 (glucuronosyltransferase S)                  | NM_172124    | 0.0130716 | 0.0645005 | -1.56506 |
| ILMN_222923 | B3gnt5        | UDP-GlcNAc:betaGal beta-1,3-N-acetylglucosaminyltransferase 5                 |              | 0.0045183 | 0.0390671 | 1.57699  |
| ILMN_203218 | B430109P06Rik |                                                                               |              | 0.0063076 | 0.0459599 | 1.58822  |
| ILMN_204550 | B930008G03Rik |                                                                               |              | 0.0234437 | 0.0870481 | 1.53951  |
| ILMN_204753 | B930044G13Rik |                                                                               |              | 0.0221802 | 0.0845153 | 1.53132  |
| ILMN_209456 | BC005537      | CDNA sequence BC005537                                                        | NM_024473    | 0.0041431 | 0.0375173 | -1.74427 |
| ILMN_215495 | Bcl2a1b       | B-cell leukemia/lymphoma 2 related protein A1b                                | NM_007534    | 0.0052434 | 0.0422709 | -1.59717 |
| ILMN_188537 | Bcl7a         | B-cell CLL/lymphoma 7A                                                        | NM_029850    | 6.08E-05  | 0.0060164 | 1.98408  |
| ILMN_221165 | Bfsp2         | Beaded filament structural protein 2, phakinin                                |              | 0.0006778 | 0.0163286 | 1.80557  |
| ILMN_211373 | Bst2          | Bone marrow stromal cell antigen 2                                            | NM_198095    | 0.0010072 | 0.0194656 | -1.65596 |
| ILMN_192205 | C130045I22Rik |                                                                               |              | 0.0243473 | 0.0883022 | 1.5021   |
| ILMN_224197 | C1qa          | Complement component 1, q subcomponent, alpha polypeptide                     | NM_007572    | 0.0009383 | 0.018829  | -1.7799  |
| ILMN_211795 | C1qb          | Complement component 1, q subcomponent, beta polypeptide                      | NM_009777    | 0.009854  | 0.0560576 | -1.83825 |
| ILMN_219967 | C1qc          | Complement component 1, q subcomponent, C chain                               | NM_007574    | 0.0079182 | 0.050991  | -1.96767 |
| ILMN_217653 | C230071H18Rik | RIKEN cDNA C230071H18 gene                                                    |              | 0.0006659 | 0.016193  | 1.59701  |
| ILMN_188891 | C230075M21Rik | RIKEN cDNA C230075M21 gene                                                    |              | 0.005423  | 0.0429078 | 1.85877  |
| ILMN_206258 | C230091E03Rik |                                                                               |              | 0.0037038 | 0.035238  | -2.2079  |
| ILMN_196664 | C330018D20Rik | RIKEN cDNA C330018D20 gene                                                    | NM_029909    | 0.006043  | 0.0448994 | -1.54208 |

|             |               |                                                                          |              |           |           |          |
|-------------|---------------|--------------------------------------------------------------------------|--------------|-----------|-----------|----------|
| ILMN_205312 | C430002D13Rik |                                                                          |              | 0.0241213 | 0.0879095 | 1.68388  |
| ILMN_218857 | Calr          | Calreticulin                                                             | NM_007591    | 0.0231077 | 0.0862922 | -1.60834 |
| ILMN_223956 | Capns1        | Calpain, small subunit 1                                                 | NM_009795    | 0.0227315 | 0.0853986 | -2.72995 |
| ILMN_223468 | Capsl         | Calcyphosine-like                                                        | NM_029341    | 2.22E-06  | 0.0018118 | 1.9268   |
| ILMN_210229 | Car2          | Carbonic anhydrase 2                                                     | NM_009801    | 0.0042219 | 0.0378922 | -2.51768 |
| ILMN_212767 | Car3          | Carbonic anhydrase 3                                                     | NM_007606    | 0.0017507 | 0.0251929 | -5.52297 |
| ILMN_223809 | Cbln1         | Cerebellin 1 precursor protein                                           | NM_019626    | 0.0186768 | 0.0778957 | 1.69095  |
| ILMN_229007 | Cbx3          | Chromobox homolog 3 (Drosophila HP1 gamma)                               | NM_007624    | 0.0118542 | 0.0614514 | -1.92653 |
| ILMN_196616 | Cc1           |                                                                          |              | 0.0013285 | 0.0224724 | 1.52277  |
| ILMN_223933 | Ccl12         | Chemokine (C-C motif) ligand 12                                          | NM_011331    | 2.51E-06  | 0.0018118 | -3.00915 |
| ILMN_216555 | Ccna2         | Cyclin A2                                                                | NM_009828    | 0.0011159 | 0.0204705 | 1.72099  |
| ILMN_191206 | Ccne2         | Cyclin E2                                                                | NM_001037134 | 0.0232411 | 0.0866033 | -1.64721 |
| ILMN_221922 | Cd14          | CD14 antigen                                                             | NM_009841    | 4.15E-05  | 0.0051928 | -1.8287  |
| ILMN_218570 | Cd3d          | CD3 antigen, delta polypeptide                                           | NM_013487    | 0.0039767 | 0.0367319 | 2.35807  |
| ILMN_222081 | Cd47          | CD47 antigen (Rh-related antigen, integrin-associated signal transducer) | NM_010581    | 0.0097472 | 0.0558756 | 1.50834  |
| ILMN_210940 | Cd79b         | CD79B antigen                                                            | NM_008339    | 0.0025687 | 0.0297769 | 1.93807  |
| ILMN_209396 | Cdk4          | Cyclin-dependent kinase 4                                                | NM_009870    | 0.0045113 | 0.0390482 | -1.81255 |
| ILMN_219392 | Cdkn1c        | Cyclin-dependent kinase inhibitor 1C (P57)                               | NM_001161624 | 0.0098767 | 0.0560949 | 2.04581  |
| ILMN_190329 | Celf2         |                                                                          | NM_001110228 | 0.0048737 | 0.0404436 | 1.79018  |
| ILMN_213056 | Cep152        | Centrosomal protein 152                                                  | NM_001081091 | 0.0155064 | 0.0710184 | 1.58344  |
| ILMN_216300 | Cfl1          | Cofilin 1, non-muscle                                                    | NM_007687    | 0.0021523 | 0.0274444 | 1.5604   |
| ILMN_213309 | Cgrrf1        | Cell growth regulator with ring finger domain 1                          | NM_026832    | 0.0006103 | 0.015543  | -1.52887 |
| ILMN_218521 | Chpt1         | Choline phosphotransferase 1                                             | NM_001146690 | 0.0054338 | 0.0429078 | -1.51276 |
| ILMN_217790 | Ckap2         | Cytoskeleton associated protein 2                                        | NM_001004140 | 0.0056304 | 0.0435119 | -1.83554 |
| ILMN_210718 | Clasp2        | CLIP associating protein 2                                               | NM_001081960 | 0.01048   | 0.0579782 | 1.53118  |
| ILMN_210305 | Clec4e        | C-type lectin domain family 4, member e                                  | NM_019948    | 0.0078498 | 0.0506651 | -1.61456 |
| ILMN_184708 | Cnih          | Cornichon homolog (Drosophila)                                           | NM_009919    | 0.0074404 | 0.0493637 | -2.096   |
| ILMN_222860 | Cnp           | 2',3'-cyclic nucleotide 3' phosphodiesterase                             | NM_001146318 | 0.0001304 | 0.0079094 | 1.59139  |
| ILMN_208637 | Cntn2         | Contactin 2                                                              | NM_177129    | 0.0077642 | 0.0503299 | 2.66641  |
| ILMN_223214 | Col1a2        | Collagen, type I, alpha 2                                                | NM_007743    | 0.0240285 | 0.0877855 | 1.50061  |
| ILMN_211069 | Cox4i2        | Cytochrome c oxidase subunit IV isoform 2                                | NM_053091    | 0.0065843 | 0.0466429 | 1.94053  |
| ILMN_219945 | Cplx2         | Complexin 2                                                              | NM_009946    | 8.70E-05  | 0.0068415 | 1.69765  |
| ILMN_218575 | Cst7          | Cystatin F (leukocystatin)                                               | NM_009977    | 0.0010192 | 0.0195169 | 1.66776  |



|             |               |                                                                                  |              |           |           |          |
|-------------|---------------|----------------------------------------------------------------------------------|--------------|-----------|-----------|----------|
| ILMN_218498 | Ctnnb1        | Catenin (cadherin associated protein), beta 1                                    | NM_001165902 | 0.0169637 | 0.0742709 | 1.56621  |
| ILMN_189442 | Cxcl16        | Chemokine (C-X-C motif) ligand 16                                                | NM_023158    | 0.0019059 | 0.0257336 | -1.58712 |
| ILMN_217785 | Cxcr7         | Chemokine (C-X-C motif) receptor 7                                               | NM_007722    | 0.0087591 | 0.0533092 | 1.75431  |
| ILMN_210012 | Cyb5r4        | Cytochrome b5 reductase 4                                                        | NM_024195    | 0.0262081 | 0.0913877 | -2.18494 |
| ILMN_218995 | Cyp2f2        | Cytochrome P450, family 2, subfamily f, polypeptide 2                            | NM_007817    | 0.0059897 | 0.0447213 | 1.77086  |
| ILMN_205970 | D130062J21Rik | RIKEN cDNA D130062J21 gene                                                       |              | 0.0109531 | 0.0593397 | 1.66971  |
| ILMN_204935 | D230005E09Rik |                                                                                  |              | 0.0011845 | 0.0212429 | 1.95308  |
| ILMN_206057 | D330001D04Rik |                                                                                  |              | 0.0024421 | 0.0291352 | 1.56972  |
| ILMN_206065 | D330012P07Rik |                                                                                  |              | 0.0069366 | 0.0476952 | 1.82097  |
| ILMN_206504 | D630035D13Rik |                                                                                  |              | 0.0123909 | 0.0628877 | 1.73824  |
| ILMN_203436 | D730006F06Rik |                                                                                  |              | 0.0052811 | 0.042444  | 1.72567  |
| ILMN_208662 | D930015E06Rik | RIKEN cDNA D930015E06 gene                                                       | NM_172681    | 0.0017644 | 0.0251929 | 1.52389  |
| ILMN_205388 | D930049D10Rik |                                                                                  |              | 0.001293  | 0.0222004 | 1.60882  |
| ILMN_218436 | Ddit4l        | DNA-damage-inducible transcript 4-like                                           | NM_030143    | 0.0177171 | 0.0757754 | 2.12988  |
| ILMN_216603 | Ddx17         | DEAD (Asp-Glu-Ala-Asp) box polypeptide 17                                        | NM_001040187 | 0.0008309 | 0.017623  | 1.54368  |
| ILMN_195752 | Ddx58         | DEAD (Asp-Glu-Ala-Asp) box polypeptide 58                                        | NM_172689    | 0.0032498 | 0.0332897 | -1.57201 |
| ILMN_218091 | Depp          |                                                                                  |              | 0.0211604 | 0.0829052 | 1.56581  |
| ILMN_188868 | Dgkg          | Diacylglycerol kinase, gamma                                                     | NM_138650    | 0.0100495 | 0.0568081 | 1.65583  |
| ILMN_214861 | Dlg7          | Discs, large homolog 7 (Drosophila)                                              |              | 0.0036868 | 0.0351402 | 1.53779  |
| ILMN_188938 | Dlst          | Dihydrolypoamide S-succinyltransferase (E2 component of 2-oxo-glutarate complex) | NM_030225    | 0.0076556 | 0.0501236 | 1.75246  |
| ILMN_218325 | Dnajc7        | DnaJ (Hsp40) homolog, subfamily C, member 7                                      | NM_019795    | 5.61E-05  | 0.0060164 | 1.82936  |
| ILMN_203087 | Dpp4          | Dipeptidylpeptidase 4                                                            | NM_001159543 | 8.97E-06  | 0.0024215 | 1.90726  |
| ILMN_214164 | Dtl           | Denticleless homolog (Drosophila)                                                | NM_029766    | 0.0015249 | 0.0236568 | 1.62856  |
| ILMN_212470 | Dusp2         | Dual specificity phosphatase 2                                                   | NM_010090    | 0.0035438 | 0.0343414 | 1.60774  |
| ILMN_218093 | Dusp7         | Dual specificity phosphatase 7                                                   | NM_153459    | 0.0052684 | 0.0423742 | 1.70225  |
| ILMN_205792 | E030020A01Rik |                                                                                  |              | 0.0040139 | 0.0369449 | -1.5087  |
| ILMN_206892 | E030038D23Rik |                                                                                  |              | 0.0288633 | 0.0957397 | 1.56094  |
| ILMN_203538 | E130202F10Rik |                                                                                  |              | 0.0058363 | 0.0441304 | 1.63014  |
| ILMN_207230 | E130301F21Rik |                                                                                  |              | 0.0124275 | 0.0629564 | -1.52684 |
| ILMN_214463 | E2f4          | E2F transcription factor 4                                                       | NM_148952    | 0.0026423 | 0.0301609 | 1.87158  |
| ILMN_205261 | E330013M12Rik |                                                                                  |              | 4.11E-05  | 0.0051928 | 1.7282   |
| ILMN_206618 | E330031M19Rik |                                                                                  |              | 0.0001173 | 0.007666  | 1.50505  |
| ILMN_237050 | Ear4          | Eosinophil-associated, ribonuclease A family, member 4                           | NM_001017422 | 0.0148788 | 0.0696075 | 2.66472  |

|             |          |                                                               |              |           |           |          |
|-------------|----------|---------------------------------------------------------------|--------------|-----------|-----------|----------|
| ILMN_213475 | Ecm1     | Extracellular matrix protein 1                                | NM_001252653 | 0.0016357 | 0.0243281 | -1.62337 |
| ILMN_217037 | Efr3a    |                                                               | NM_133766    | 0.0026101 | 0.0300893 | -1.5311  |
| ILMN_216453 | Eif3b    | Eukaryotic translation initiation factor 3, subunit B         | NM_133916    | 0.0209368 | 0.0827031 | -1.79389 |
| ILMN_216646 | Eif4ebp2 | Eukaryotic translation initiation factor 4E binding protein 2 | NM_010124    | 0.0039026 | 0.0363685 | 1.58776  |
| ILMN_202214 | Emb      | Embigin                                                       | NM_010330    | 0.0240687 | 0.0878709 | -2.14062 |
| ILMN_212810 | Emd      | Emerin                                                        | NM_007927    | 0.010087  | 0.0568081 | -1.58839 |
| ILMN_227395 | Eprs     | Glutamyl-prolyl-tRNA synthetase                               | NM_029735    | 0.0070595 | 0.0479623 | -1.59409 |
| ILMN_220172 | Evi2a    | Ecotropic viral integration site 2a                           | NM_001033711 | 0.0117341 | 0.0611851 | -2.01887 |
| ILMN_191021 | Fads6    | Fatty acid desaturase domain family, member 6                 | NM_178035    | 0.0006421 | 0.0159091 | 1.5514   |
| ILMN_220304 | Faim3    | Fas apoptotic inhibitory molecule 3                           | NM_026976    | 0.001603  | 0.0241801 | 1.99741  |
| ILMN_223889 | FAM126A  | family with sequence similarity 126, member A                 | NM_053090    | 0.0078304 | 0.0506335 | 1.55023  |
| ILMN_210354 | Fam133b  | family with sequence similarity 133, member B                 | NM_001042501 | 0.0032246 | 0.0332897 | 1.5025   |
| ILMN_220048 | Fam3c    | family with sequence similarity 3, member C                   | NM_138587    | 0.0025849 | 0.0299313 | 1.51486  |
| ILMN_222725 | Fam63b   | family with sequence similarity 63, member B                  | NM_172772    | 0.0001227 | 0.0077089 | 1.92826  |
| ILMN_191384 | Fam78b   | family with sequence similarity 78, member B                  | NM_001160261 | 1.46E-05  | 0.0031072 | -1.81615 |
| ILMN_219622 | Fcgr1    | Fc receptor, IgG, high affinity I                             | NM_010186    | 5.78E-07  | 0.0010971 | -1.62824 |
| ILMN_211779 | Fcrla    | Fc receptor-like A                                            | NM_001160215 | 0.0082826 | 0.0521075 | 1.82753  |
| ILMN_212438 | Fcrls    | Fc receptor-like S, scavenger receptor                        | NM_030707    | 1.08E-05  | 0.0027452 | -2.20162 |
| ILMN_217290 | Fech     | Ferrochelatase                                                | NM_007998    | 0.0187108 | 0.0780064 | -1.66076 |
| ILMN_214571 | Fermt3   | fermitin family homolog 3 (Drosophila)                        | NM_153795    | 0.0138239 | 0.0668324 | -1.68281 |
| ILMN_204362 | Fkbp15   | FK506 binding protein 15                                      | NM_001045528 | 0.0210438 | 0.0828342 | 1.71567  |
| ILMN_192281 | Fkbp1a   | FK506 binding protein 1a                                      | NM_008019    | 3.16E-05  | 0.004642  | -1.55843 |
| ILMN_214651 | Foxc1    | Forkhead box C1                                               | NM_008592    | 0.0012859 | 0.0221497 | -1.76148 |
| ILMN_194758 | Foxo1    | Forkhead box O1                                               | NM_019739    | 9.42E-05  | 0.0070855 | 1.53116  |
| ILMN_209602 | Fryl     | Furry homolog-like (Drosophila)                               | NM_028194    | 0.0001309 | 0.0079094 | 1.63638  |
| ILMN_209602 | Fryl     | Furry homolog-like (Drosophila)                               | NM_028194    | 0.0111684 | 0.0598173 | 1.80601  |
| ILMN_210866 | Fxyd6    | FXFD domain-containing ion transport regulator 6              | NM_022004    | 0.0272094 | 0.0931856 | 2.0738   |
| ILMN_190245 | Gatad2b  | GATA zinc finger domain containing 2B                         | NM_139304    | 0.0003986 | 0.0129302 | 1.5163   |
| ILMN_219053 | Gbas     | Glioblastoma amplified sequence                               | NM_008095    | 0.0001334 | 0.0079227 | -1.55946 |
| ILMN_199021 | Gm10233  | predicted pseudogene 10233                                    |              | 0.0018619 | 0.0254843 | -2.18502 |
| ILMN_197716 | Gm10705  | predicted gene 10705                                          |              | 0.0246642 | 0.0887741 | -2.07586 |

|             |         |                            |              |           |           |          |
|-------------|---------|----------------------------|--------------|-----------|-----------|----------|
| ILMN_244723 | Gm11428 | predicted gene 11428       | NM_001081957 | 0.0188365 | 0.0784312 | -1.90961 |
| ILMN_197470 | Gm14044 | predicted gene 14044       |              | 0.0276264 | 0.0937254 | -1.52624 |
| ILMN_216067 | Gm14085 | In multiple Geneids        |              | 0.0190802 | 0.0790388 | -1.64434 |
| ILMN_184683 | Gm14680 | predicted gene 14680       |              | 0.0023934 | 0.0289977 | 1.64193  |
| ILMN_195867 | Gm14698 | predicted gene 14698       |              | 0.0005995 | 0.0154784 | -1.5779  |
| ILMN_198304 | Gm15596 | predicted gene 15596       |              | 0.0106406 | 0.0583114 | -2.23534 |
| ILMN_200058 | Gm16372 | predicted pseudogene 16372 |              | 0.0028126 | 0.0311536 | -2.50931 |
| ILMN_210809 | Gm16971 | predicted gene, 16971      |              | 0.0052332 | 0.0422292 | -2.10082 |
| ILMN_190417 | Gm2423  | predicted gene 2423        |              | 0.0264333 | 0.0917618 | -2.47975 |
| ILMN_196255 | Gm2589  | predicted gene 2589        |              | 0.0286592 | 0.0953422 | -1.98929 |
| ILMN_214618 | Gm2893  | predicted gene 2893        |              | 0.0024438 | 0.0291352 | -4.04995 |
| ILMN_206227 | Gm3411  | predicted gene 3411        |              | 0.0027576 | 0.0309782 | 1.65613  |
| ILMN_199332 | GM3758  | predicted gene 3758        |              | 0.0134603 | 0.0657054 | -1.72806 |
| ILMN_184725 | GM4353  | predicted gene 4353        |              | 0.0110368 | 0.0594849 | -1.90898 |
| ILMN_198435 | Gm4757  | predicted gene 4757        |              | 0.0009458 | 0.0188359 | -1.9877  |
| ILMN_197091 | Gm4788  | predicted gene 4788        | NM_001029977 | 0.0018525 | 0.0254843 | -3.71452 |
| ILMN_198486 | Gm5052  | predicted gene 5052        |              | 0.0001064 | 0.0074658 | -1.93988 |
| ILMN_215850 | Gm5131  | predicted gene 5131        |              | 5.20E-06  | 0.0019724 | -1.92088 |
| ILMN_197687 | Gm5150  | predicted gene 5150        | NM_001081687 | 0.0276232 | 0.0937254 | -1.59606 |
| ILMN_211083 | Gm5222  | predicted gene 5222        |              | 0.0018925 | 0.025677  | -3.23066 |
| ILMN_200808 | Gm5328  | predicted gene 5328        |              | 0.0122936 | 0.0626728 | 1.66958  |
| ILMN_200810 | Gm5330  | predicted gene 5330        |              | 0.00657   | 0.0466075 | 1.64564  |
| ILMN_198488 | Gm5521  | predicted gene 5521        |              | 0.0008603 | 0.0178482 | -1.63581 |
| ILMN_197915 | Gm5552  | predicted gene 5552        |              | 0.0293547 | 0.09633   | -1.91107 |
| ILMN_200277 | Gm5564  | predicted gene 5564        |              | 0.0263017 | 0.0914872 | -1.57535 |
| ILMN_200679 | Gm5578  | predicted pseudogene 5578  |              | 0.014173  | 0.0677918 | 1.71111  |
| ILMN_200751 | Gm5586  | predicted gene 5586        |              | 0.0211085 | 0.0828916 | -2.80361 |
| ILMN_233946 | Gm5643  | predicted gene 5643        |              | 0.0003758 | 0.0125503 | -3.3991  |
| ILMN_200478 | Gm5814  | predicted pseudogene 5814  |              | 8.58E-06  | 0.0024215 | -3.36827 |
| ILMN_210322 | Gm5815  | predicted pseudogene 5815  |              | 0.0008548 | 0.0178482 | 1.59649  |
| ILMN_198318 | Gm6663  | predicted gene 6663        |              | 0.0095618 | 0.0554419 | -3.44491 |
| ILMN_198083 | Gm6705  | predicted gene 6705        |              | 0.0005228 | 0.0146151 | -1.61874 |
| ILMN_199989 | Gm6745  | predicted gene 6745        |              | 0.024523  | 0.0886548 | 1.59033  |
| ILMN_196888 | Gm6969  | predicted pseudogene 6969  |              | 0.0039898 | 0.0367614 | -2.68434 |
| ILMN_197711 | Gm7083  | predicted gene 7083        |              | 0.026284  | 0.0914872 | -2.17266 |
| ILMN_210527 | Gm7122  | predicted pseudogene 7122  |              | 0.0010252 | 0.0195617 | -2.75045 |
| ILMN_197393 | Gm8416  | predicted gene 8416        |              | 0.0013207 | 0.0224169 | -1.95836 |
| ILMN_247624 | Gm8909  | predicted gene 8909        | NM_001081032 | 0.000692  | 0.0164058 | -2.94121 |
| ILMN_207496 | Gm9391  | predicted gene 9391        |              | 0.0091722 | 0.0545579 | 1.91654  |
| ILMN_220727 | Gm9574  |                            |              | 0.028894  | 0.0957577 | -2.23881 |

|             |                                                    |                                                             |              |           |           |          |
|-------------|----------------------------------------------------|-------------------------------------------------------------|--------------|-----------|-----------|----------|
| ILMN_215032 | Gp38                                               |                                                             |              | 0.0275317 | 0.0937254 | 1.71155  |
| ILMN_185836 | Gpi1                                               | Glucose phosphate isomerase 1                               | NM_008155    | 0.0002762 | 0.0107598 | -1.73225 |
| ILMN_211323 | Gpnmb                                              | Glycoprotein (transmembrane) nmb                            | NM_053110    | 0.0139873 | 0.0673288 | 1.70671  |
| ILMN_211662 | Gpr171                                             | G protein-coupled receptor 171                              | NM_173398    | 0.0028677 | 0.0314965 | 1.76673  |
| ILMN_219947 | Gpx3                                               | Glutathione peroxidase 3                                    | NM_008161    | 6.36E-05  | 0.0060733 | -2.49393 |
| ILMN_210612 | Grit                                               | Rho GTPase-activating protein                               |              | 0.0114691 | 0.0608626 | 1.54692  |
| ILMN_258260 | Gstp2                                              | Glutathione S-transferase, pi 2                             | NM_181796    | 0.0162156 | 0.0728477 | -1.82593 |
| ILMN_208621 | H2-K2                                              |                                                             |              | 0.0313312 | 0.0993929 | -2.3394  |
| ILMN_193997 | H2-Ob                                              | Histocompatibility 2, O region beta locus                   | NM_010389    | 0.0054174 | 0.0429078 | 1.56154  |
| ILMN_216783 | H2-Q6                                              |                                                             |              | 0.0066376 | 0.0468356 | -2.46727 |
| ILMN_216783 | H2-Q6                                              |                                                             |              | 0.0001138 | 0.0075762 | -2.28778 |
| ILMN_223897 | H2-Q8                                              | Histocompatibility 2, Q region locus 8                      | NM_023124    | 0.0061702 | 0.0453375 | -1.66392 |
| ILMN_223761 | Hdac7                                              |                                                             | NM_001204275 | 0.0003141 | 0.0115449 | 1.67247  |
| ILMN_218025 | Hey1                                               | Hairy/enhancer-of-split related with YRPW motif 1           | NM_010423    | 0.0063781 | 0.0461446 | 1.54629  |
| ILMN_195878 | Hk1                                                | Hexokinase 1                                                | NM_001146100 | 0.0070215 | 0.0477975 | -1.57183 |
| ILMN_219962 | Hmga1                                              | High mobility group AT-hook 1                               | NM_001025427 | 0.0007495 | 0.0169259 | 1.51007  |
| ILMN_217580 | Hmha1                                              | Histocompatibility (minor) HA-1                             | NM_001142701 | 0.0173415 | 0.0747723 | 1.60247  |
| ILMN_211433 | Hnrnpa2b1                                          | Heterogeneous nuclear ribonucleoprotein A2/B1               | NM_016806    | 0.0151427 | 0.0703115 | -1.63225 |
| ILMN_217576 | Hnrph1                                             | Heterogeneous nuclear ribonucleoprotein H1                  |              | 0.0063347 | 0.0460609 | -2.5509  |
| ILMN_223593 | Hspa2                                              | Heat shock protein 2                                        | NM_001002012 | 2.95E-06  | 0.0018118 | 1.55428  |
| ILMN_222238 | Htra1                                              | HtrA serine peptidase 1                                     | NM_019564    | 0.0047066 | 0.0398158 | -1.96814 |
| ILMN_217646 | Htra3                                              | HtrA serine peptidase 3                                     | NM_001042615 | 0.0141478 | 0.0677534 | -1.5361  |
| ILMN_186902 | ldh1                                               | Isocitrate dehydrogenase 1 (NADP+), soluble                 | NM_001111320 | 0.0169548 | 0.0742709 | -2.63707 |
| ILMN_209421 | ldh2                                               | Isocitrate dehydrogenase 2 (NADP+), mitochondrial           |              | 0.0107269 | 0.0585252 | 1.6909   |
| ILMN_214979 | Ifit3                                              | Interferon-induced protein with tetratricopeptide repeats 3 | NM_010501    | 0.0014242 | 0.0229105 | -1.71379 |
| ILMN_217958 | lgfbp6                                             | Insulin-like growth factor binding protein 6                | NM_008344    | 0.0229563 | 0.0859095 | -1.66356 |
| ILMN_218449 | Igha                                               |                                                             |              | 4.18E-05  | 0.0051928 | -4.85564 |
| ILMN_192751 | IGHA_J00475\$V00785_ig_heavy_constant_alpha_135    |                                                             |              | 0.0081522 | 0.0516291 | -1.57519 |
| ILMN_222723 | Ighg                                               | Immunoglobulin heavy chain (gamma polypeptide)              |              | 0.0095514 | 0.0554419 | -2.17337 |
| ILMN_195481 | Ighg1                                              |                                                             |              | 0.0010919 | 0.0201009 | -2.40016 |
| ILMN_187077 | IGHG1_J00453\$V00793_ig_heavy_constant_gamma_1_792 |                                                             |              | 0.0003634 | 0.012374  | -2.92562 |
| ILMN_193885 | Ighv1-20                                           | immunoglobulin heavy variable V1-20                         |              | 0.0003704 | 0.0124528 | -2.60777 |

|             |                                              |                                            |           |           |          |
|-------------|----------------------------------------------|--------------------------------------------|-----------|-----------|----------|
| ILMN_210701 | Ighv1-62                                     | immunoglobulin heavy variable V1-62        | 0.0008595 | 0.0178482 | -5.06891 |
| ILMN_211990 | Ighv1-62-3                                   | immunoglobulin heavy variable 1-62-3       | 0.0015205 | 0.0236226 | -1.77975 |
| ILMN_215902 | Ighv5-12-4                                   | immunoglobulin heavy variable 5-12-4       | 0.0068058 | 0.0474043 | -1.63392 |
| ILMN_213335 | Ighv5-16                                     | immunoglobulin heavy variable 5-16         | 0.0001788 | 0.0092109 | -1.50965 |
| ILMN_212697 | Ighv6-3                                      | immunoglobulin heavy variable 6-3          | 0.000185  | 0.0093923 | -2.09242 |
| ILMN_190076 | Ighv8-9                                      | immunoglobulin heavy variable V8-9         | 0.0001563 | 0.0087869 | -1.76233 |
| ILMN_190903 | Ighvhs107.a3.106                             | Ig heavy chain V region VHS107.a3.106      | 0.0037509 | 0.0355247 | -1.53318 |
| ILMN_223600 | Igkv10-95                                    | immunoglobulin kappa variable 10-95        | 0.0303845 | 0.0978014 | -3.20095 |
| ILMN_211208 | Igkv1-133                                    | immunoglobulin kappa variable 1-133        | 0.0204856 | 0.0817547 | -2.86178 |
| ILMN_222830 | Igkv12-41                                    |                                            | 0.0033851 | 0.0338347 | -4.64369 |
| ILMN_219649 | Igkv12-46                                    | immunoglobulin kappa variable 12-46        | 0.0028087 | 0.0311536 | -4.18172 |
| ILMN_185365 | Igkv12-67                                    | immunoglobulin kappa chain variable 12-67  | 0.0029119 | 0.0316491 | -2.53948 |
| ILMN_217861 | Igkv12-89                                    | immunoglobulin kappa chain variable 12-89  | 0.0031933 | 0.0332897 | -2.60101 |
| ILMN_216381 | Igkv13-84                                    | immunoglobulin kappa chain variable 13-84  | 0.0009436 | 0.018829  | -4.10403 |
| ILMN_210508 | Igkv14-126                                   | immunoglobulin kappa variable 14-126       | 0.0109986 | 0.059463  | -3.19488 |
| ILMN_191930 | Igkv15-103                                   | immunoglobulin kappa chain variable 15-103 | 0.0253557 | 0.0900847 | -2.40111 |
| ILMN_193298 | IGKV1-88_AJ231206_Ig_kappa_variable_1-88_289 |                                            | 0.026042  | 0.0910563 | -1.62898 |
| ILMN_192326 | IGKV1-99_AJ231207_Ig_kappa_variable_1-99_1   |                                            | 0.0129168 | 0.0641301 | -2.3642  |
| ILMN_187862 | Igkv2-116                                    | immunoglobulin kappa variable 2-116        | 0.0007235 | 0.0165462 | -1.53856 |
| ILMN_185385 | IGKV3-2_X16954_Ig_kappa_variable_3-2_18      |                                            | 0.0160775 | 0.0725756 | -3.9423  |
| ILMN_217531 | Igkv3-4                                      |                                            | 0.0203632 | 0.0817028 | -2.10696 |
| ILMN_189280 | IGKV4-53_AJ231231_Ig_kappa_variable_4-53_12  |                                            | 0.0008103 | 0.01747   | -2.4906  |
| ILMN_210750 | Igkv4-54                                     |                                            | 0.009811  | 0.0560462 | -3.84291 |
| ILMN_201508 | Igkv4-60                                     |                                            | 0.0033486 | 0.0337587 | -2.78195 |
| ILMN_194801 | Igkv4-62                                     |                                            | 0.0040247 | 0.0370119 | -6.14983 |
| ILMN_192727 | Igkv4-68                                     |                                            | 0.0109014 | 0.0591038 | -3.91348 |
| ILMN_195194 | IGKV4-71_AJ231218_Ig_kappa_variable_4-71_20  |                                            | 0.003397  | 0.0338347 | -5.13339 |
| ILMN_211147 | Igkv4-72                                     |                                            | 0.0105228 | 0.0580614 | -4.35146 |
| ILMN_188601 | IGKV4-73_AJ231216_Ig_kappa_variable_4-73_18  |                                            | 0.0061157 | 0.0450954 | -4.85363 |
| ILMN_189696 | Igkv4-74                                     |                                            | 0.0105641 | 0.0581218 | -5.92739 |
| ILMN_195045 | Igkv4-77                                     |                                            | 0.0316041 | 0.0997743 | -2.57318 |
| ILMN_222174 | Igkv4-79                                     |                                            | 0.0047395 | 0.0399167 | -4.95582 |

|             |                                               |                                                        |              |           |           |          |
|-------------|-----------------------------------------------|--------------------------------------------------------|--------------|-----------|-----------|----------|
| ILMN_189593 | IGKV4-80_AJ231213_Ig_kappa_variable_4-80_91   |                                                        |              | 0.0044794 | 0.039018  | -1.61517 |
| ILMN_193923 | IGKV4-91_AJ231229_Ig_kappa_variable_4-91_29   |                                                        |              | 0.0296189 | 0.0967152 | -1.95694 |
| ILMN_212878 | Igk-V5                                        |                                                        |              | 0.0206645 | 0.0821551 | -3.24699 |
| ILMN_191857 | Igkv5-48                                      |                                                        |              | 0.0002178 | 0.0099812 | -5.93831 |
| ILMN_220501 | Igkv6-23                                      |                                                        |              | 0.0122476 | 0.0625615 | -6.2353  |
| ILMN_216293 | Igk-V8                                        | Immunoglobulin kappa chain variable 8 (V8)             |              | 0.0229267 | 0.0858294 | -2.873   |
| ILMN_189603 | Igkv8-16                                      |                                                        |              | 0.0178312 | 0.0760061 | -1.70556 |
| ILMN_212982 | Igkv8-19                                      |                                                        |              | 0.0085392 | 0.0526654 | -3.58653 |
| ILMN_214561 | Igkv9-124                                     |                                                        |              | 0.0096902 | 0.0556811 | -4.00106 |
| ILMN_187173 | IGKV9-128_AJ231245_Ig_kappa_variable_9-128_15 |                                                        |              | 0.007075  | 0.0480055 | -4.17136 |
| ILMN_219509 | Igkvk33-85                                    |                                                        |              | 0.0060652 | 0.0448994 | -1.79959 |
| ILMN_196028 | Igl                                           |                                                        |              | 0.0086    | 0.0527708 | -2.29238 |
| ILMN_186543 | Igl1                                          | Immunoglobulin lambda-like polypeptide 1               | NM_001190325 | 4.76E-06  | 0.0019724 | 3.13501  |
| ILMN_216227 | Il13ra1                                       | Interleukin 13 receptor, alpha 1                       | NM_133990    | 0.0282862 | 0.0946957 | -1.5942  |
| ILMN_221311 | Il4i1                                         | Interleukin 4 induced 1                                | NM_010215    | 0.0242262 | 0.0880769 | 1.59014  |
| ILMN_204884 | Il7r                                          | Interleukin 7 receptor                                 | NM_008372    | 0.0001079 | 0.0074684 | 1.74528  |
| ILMN_212867 | Isg15                                         | ISG15 ubiquitin-like modifier                          |              | 0.0067622 | 0.0472319 | -1.90784 |
| ILMN_220885 | Ism1                                          |                                                        | NM_001126490 | 0.0005487 | 0.0147496 | 1.88422  |
| ILMN_213333 | Kbtbd5                                        | Kelch repeat and BTB (POZ) domain containing 5         | NM_028202    | 0.0087999 | 0.0534568 | -1.6574  |
| ILMN_208819 | Kctd20                                        | Potassium channel tetramerisation domain containing 20 | NM_025888    | 0.0081605 | 0.0516499 | -1.50012 |
| ILMN_218823 | Kctd3                                         | Potassium channel tetramerisation domain containing 3  | NM_172650    | 0.0071632 | 0.0483458 | 1.62417  |
| ILMN_201976 | Kif23                                         | Kinesin family member 23                               | NM_024245    | 0.0157059 | 0.0715118 | -2.7633  |
| ILMN_201976 | KIF23                                         | Kinesin family member 23                               | NM_024245    | 0.025422  | 0.0902315 | 1.57003  |
| ILMN_218058 | Kih14                                         | Kelch-like 14 (Drosophila)                             | NM_001081403 | 7.62E-06  | 0.0024215 | 1.61892  |
| ILMN_228856 | Kih32                                         | Kelch-like 32 (Drosophila)                             | NM_001033531 | 6.10E-05  | 0.0060164 | 1.53746  |
| ILMN_211787 | Kih6                                          | Kelch-like 6 (Drosophila)                              | NM_183390    | 0.000691  | 0.0164058 | 1.53572  |
| ILMN_216774 | Kik8                                          | Kallikrein related-peptidase 8                         | NM_008940    | 0.0013841 | 0.0226262 | 1.58392  |
| ILMN_199376 | Kng2                                          | Kininogen 2                                            | NM_001102409 | 0.0006602 | 0.0161054 | -2.1638  |
| ILMN_212848 | Krit1                                         | KRIT1, ankyrin repeat containing                       | NM_001170552 | 0.0014868 | 0.0234831 | 1.68997  |
| ILMN_212848 | Krit1                                         | KRIT1, ankyrin repeat containing                       | NM_001170552 | 0.017296  | 0.0747302 | 1.55184  |
| ILMN_201338 | Larp1                                         | La ribonucleoprotein domain family, member 1           | NM_028451    | 0.0039296 | 0.0364437 | -1.91583 |
| ILMN_215964 | Ldhc                                          | Lactate dehydrogenase C                                | NM_013580    | 0.0012547 | 0.0217919 | 1.62554  |
| ILMN_209512 | Ldoc1l                                        | Leucine zipper, down-regulated in cancer 1-like        | NM_177630    | 0.0012837 | 0.0221491 | 1.6019   |
| ILMN_209652 | Lgmn                                          | Legumain                                               | NM_011175    | 0.0221096 | 0.084464  | -2.53787 |
| ILMN_201677 | LOC100040243                                  | hypothetical protein LOC100040243                      |              | 0.0201016 | 0.0810576 | 1.57349  |

|             |              |                                                                                                                                                                                          |           |           |          |
|-------------|--------------|------------------------------------------------------------------------------------------------------------------------------------------------------------------------------------------|-----------|-----------|----------|
| ILMN_190047 | LOC100044566 | similar to Nuclear receptor coactivator 1 (NCoA-1) (Steroid receptor coactivator 1) (SRC-1) (Nuclear receptor coactivator protein 1) (mNRC-1)                                            | 0.0169604 | 0.0742709 | 1.62967  |
| ILMN_188063 | LOC100045617 | similar to Eukaryotic translation initiation factor 4A2                                                                                                                                  | 0.0110348 | 0.0594849 | -2.5039  |
| ILMN_221594 | LOC100045882 | hypothetical protein LOC100045882                                                                                                                                                        | 0.0024534 | 0.0291507 | 1.57943  |
| ILMN_186715 | LOC100047132 | similar to monoclonal antibody 17-1A, light chain                                                                                                                                        | 0.0129094 | 0.0641301 | -3.12752 |
| ILMN_186243 | LOC100047162 | similar to immunoglobulin kappa-chain                                                                                                                                                    | 0.0212041 | 0.0829446 | -5.47982 |
| ILMN_202556 | LOC100047273 | hypothetical protein LOC100047273                                                                                                                                                        | 0.026538  | 0.0919726 | 1.60417  |
| ILMN_209887 | LOC100047316 | similar to anti-MOG Z12 variable light chain                                                                                                                                             | 0.0043587 | 0.0385303 | -5.3641  |
| ILMN_188128 | LOC100047628 | similar to Chain L, Structural Basis Of Antigen Mimicry In A Clinically Relevant Melanoma Antigen System                                                                                 | 0.0070029 | 0.0477834 | -1.64717 |
| ILMN_186258 | LOC100048346 | similar to ubiquitin specific protease UBP43                                                                                                                                             | 0.000729  | 0.0166061 | -1.84124 |
| ILMN_197504 | LOC219145    | similar to Heterogeneous nuclear ribonucleoprotein A1 (Helix-destabilizing protein) (Single-strand binding protein) (hnRNP core protein A1) (HDP-1) (Topoisomerase-inhibitor suppressed) | 0.0268907 | 0.0926117 | -1.7811  |
| ILMN_215575 | LOC232060    | similar to monoclonal antibody kappa light chain                                                                                                                                         | 0.0128413 | 0.0639679 | -4.07342 |
| ILMN_198956 | LOC234360    | similar to hypothetical protein FLJ20445                                                                                                                                                 | 0.00563   | 0.0435119 | -2.28058 |
| ILMN_198324 | LOC271490    | similar to pendulin                                                                                                                                                                      | 0.0133198 | 0.0653245 | -2.34689 |
| ILMN_199267 | LOC272683    | similar to variable region of immunoglobulin kappa light chain                                                                                                                           | 0.0167053 | 0.0737629 | -3.14814 |
| ILMN_198234 | LOC333744    | similar to Archain 1                                                                                                                                                                     | 0.0067039 | 0.047044  | -1.92703 |
| ILMN_197335 | LOC381398    |                                                                                                                                                                                          | 0.0281255 | 0.0944684 | -2.63044 |
| ILMN_197754 | LOC381501    | similar to ubiquitin-conjugating enzyme E2 variant 1 isoform b; DNA-binding protein                                                                                                      | 0.0007722 | 0.0170803 | -1.50377 |
| ILMN_199932 | LOC381578    | similar to protein 40kD                                                                                                                                                                  | 0.0278869 | 0.0941776 | -1.61222 |
| ILMN_221711 | LOC381774    |                                                                                                                                                                                          | 0.0209247 | 0.0826866 | -4.20156 |
| ILMN_200884 | LOC381889    |                                                                                                                                                                                          | 0.0065574 | 0.0465791 | -1.81015 |
| ILMN_199844 | LOC383077    |                                                                                                                                                                                          | 9.12E-05  | 0.0070449 | 1.5418   |
| ILMN_199630 | LOC383775    | similar to 40S ribosomal protein S16                                                                                                                                                     | 0.0042031 | 0.037788  | 2.39598  |
| ILMN_212905 | LOC384415    |                                                                                                                                                                                          | 0.0117348 | 0.0611851 | -4.93703 |
| ILMN_200229 | LOC386005    | similar to hypothetical protein                                                                                                                                                          | 0.004574  | 0.0391048 | 1.59818  |

|             |           |                                                                              |              |           |           |          |
|-------------|-----------|------------------------------------------------------------------------------|--------------|-----------|-----------|----------|
| ILMN_200392 | LOC386405 | similar to hypothetical protein MGC37588                                     |              | 0.0024437 | 0.0291352 | -1.6131  |
| ILMN_217925 | LOC630302 | similar to Ig heavy chain V region 5-84 precursor                            |              | 0.0042488 | 0.0380028 | -1.88235 |
| ILMN_199322 | LOC674004 | similar to gonadotropin inducible ovarian transcription factor 2             |              | 0.0152464 | 0.0705824 | -1.67162 |
| ILMN_221529 | LOC674110 | similar to Ig heavy chain V region 7-39 precursor                            |              | 0.0040343 | 0.0370317 | -1.89669 |
| ILMN_210939 | LOC674706 | similar to zinc finger protein 341                                           |              | 0.0195771 | 0.0800854 | -1.6001  |
| ILMN_195977 | Lox1      | Lysyl oxidase-like 1                                                         | NM_010729    | 0.0016061 | 0.0241801 | -1.66189 |
| ILMN_237934 | Lmp       | Lymphoid-restricted membrane protein                                         | NM_008511    | 9.16E-05  | 0.0070449 | 1.68844  |
| ILMN_194484 | Lrrc29    | Leucine rich repeat containing 29                                            | NM_177449    | 0.0058894 | 0.0443658 | 1.59712  |
| ILMN_222498 | Ltb       | Lymphotoxin B                                                                | NM_008518    | 0.0081442 | 0.0516095 | -1.59191 |
| ILMN_209150 | Ly6a      | Lymphocyte antigen 6 complex, locus A                                        |              | 0.0054751 | 0.043108  | -1.63687 |
| ILMN_184595 | MALT1     | Mucosa associated lymphoid tissue lymphoma translocation gene 1              | NM_172833    | 0.0046829 | 0.0397487 | 1.54056  |
| ILMN_213057 | Map4k1    | Mitogen activated protein kinase kinase kinase 1                             | NM_008279    | 0.0257085 | 0.0905404 | 1.52963  |
| ILMN_215807 | Map4k3    | Mitogen-activated protein kinase kinase kinase 3                             |              | 0.0221789 | 0.0845153 | -1.68646 |
| ILMN_213080 | Mcm3      | Minichromosome maintenance deficient 3 ( <i>S. cerevisiae</i> )              | NM_008563    | 0.0166711 | 0.073643  | -1.91397 |
| ILMN_208709 | Med18     | Mediator of RNA polymerase II transcription, subunit 18 homolog (yeast)      | NM_026039    | 0.0017164 | 0.0249637 | 1.51181  |
| ILMN_192108 | Mela      | Melanoma antigen                                                             |              | 0.0084629 | 0.0524841 | 1.96598  |
| ILMN_221807 | Mical2    | Microtubule associated monooxygenase, calponin and LIM domain containing 2   | NM_001193305 | 0.0139925 | 0.0673288 | -1.79074 |
| ILMN_211739 | Mical3    | Microtubule associated monooxygenase, calponin and LIM domain containing 3   | NM_153396    | 0.0001662 | 0.0089511 | 1.56435  |
| ILMN_192319 | Mll1      | Myeloid/lymphoid or mixed-lineage leukemia 1                                 | NM_001081049 | 0.0162263 | 0.0728477 | 1.65728  |
| ILMN_219045 | Mmadhc    | methylmalonic aciduria (cobalamin deficiency) cblD type, with homocystinuria | NM_133839    | 0.0083362 | 0.0522246 | -2.17811 |
| ILMN_217083 | Mppe1     | Metallophosphoesterase 1                                                     | NM_172630    | 0.0170501 | 0.0744846 | -1.54515 |
| ILMN_213874 | Mrpl48    | Mitochondrial ribosomal protein L48                                          | NM_198831    | 0.0275962 | 0.0937254 | -1.53263 |
| ILMN_215402 | Ms4a3     | Membrane-spanning 4-domains, subfamily A, member 3                           | NM_133246    | 0.0280269 | 0.0942887 | -1.61876 |
| ILMN_208807 | Ms4a6d    | Membrane-spanning 4-domains, subfamily A, member 6D                          | NM_026835    | 0.0015179 | 0.0236226 | -1.8531  |



|             |          |                                                                        |              |           |           |          |
|-------------|----------|------------------------------------------------------------------------|--------------|-----------|-----------|----------|
| ILMN_203016 | Msi2h    |                                                                        |              | 0.0062975 | 0.0459499 | 1.52502  |
| ILMN_234960 | Mup6     |                                                                        | NM_001081285 | 1.11E-09  | 5.81E-06  | -3.86999 |
| ILMN_214832 | Myl9     | Myosin, light polypeptide 9, regulatory                                | NM_172118    | 0.0303899 | 0.0978014 | -1.75651 |
| ILMN_210294 | Mysm1    | Myb-like, SWIRM and MPN domains 1                                      | NM_177239    | 5.88E-05  | 0.0060164 | 2.05798  |
| ILMN_209679 | Nckap1   | NCK-associated protein 1                                               | NM_016965    | 0.0156316 | 0.0712983 | -2.38476 |
| ILMN_195057 | Nd4l     | NADH dehydrogenase subunit 4L                                          |              | 0.0161998 | 0.0728477 | -3.10361 |
| ILMN_194230 | Nd5      | NADH dehydrogenase subunit 5                                           |              | 0.0051559 | 0.0419315 | 1.71355  |
| ILMN_238643 | Ndfip1   | Nedd4 family interacting protein 1                                     | NM_022996    | 0.0012171 | 0.0216055 | -2.09432 |
| ILMN_238643 | Ndfip1   | Nedd4 family interacting protein 1                                     | NM_022996    | 0.0006168 | 0.0156234 | -1.54629 |
| ILMN_209531 | Ndufs2   | NADH dehydrogenase (ubiquinone) Fe-S protein 2                         | NM_153064    | 0.0169695 | 0.0742709 | -2.3131  |
| ILMN_219985 | Nipbl    | Nipped-B homolog (Drosophila)                                          | NM_027707    | 0.0018608 | 0.0254843 | 1.93447  |
| ILMN_203322 | Nktr     | Natural killer tumor recognition sequence                              | NM_010918    | 0.0127772 | 0.0638616 | 1.59885  |
| ILMN_235165 | Nlrc3    | NLR family, CARD domain containing 3                                   | NM_001081280 | 0.0058287 | 0.0441304 | 1.83268  |
| ILMN_185152 | Nmd3     | NMD3 homolog (S. cerevisiae)                                           | NM_133787    | 0.0179334 | 0.0760392 | 1.54506  |
| ILMN_212812 | Nme7     | Non-metastatic cells 7, protein expressed in                           | NM_138314    | 0.0005149 | 0.0145487 | 1.77613  |
| ILMN_217099 | Nola2    | Nucleolar protein family A, member 2                                   |              | 0.0293615 | 0.09633   | -2.31511 |
| ILMN_218567 | Notch3   | Notch gene homolog 3 (Drosophila)                                      | NM_008716    | 0.0010714 | 0.019883  | 1.61552  |
| ILMN_221287 | Nrm      | Nurim (nuclear envelope membrane protein)                              | NM_134122    | 0.0043951 | 0.0387356 | 1.70004  |
| ILMN_221796 | Nsbp1    | Nucleosome binding protein 1                                           |              | 0.0216825 | 0.0836843 | -1.74104 |
| ILMN_215517 | Nt5dc2   | 5'-nucleotidase domain containing 2                                    | NM_027289    | 0.0265177 | 0.0919632 | -1.5512  |
| ILMN_212179 | Oas1g    | 2'-5' oligoadenylate synthetase 1G                                     | NM_011852    | 2.27E-05  | 0.0040083 | -1.74977 |
| ILMN_216357 | Oas2     | 2'-5' oligoadenylate synthetase 2                                      | NM_145227    | 0.0007177 | 0.0165462 | -1.99476 |
| ILMN_221386 | Olfm1    | Olfactomedin-like 1                                                    | NM_172907    | 0.0051223 | 0.0417773 | 1.86981  |
| ILMN_187890 | Oxa1l    | Oxidase assembly 1-like                                                | NM_026936    | 0.0047623 | 0.040028  | -1.59396 |
| ILMN_215489 | P2rx3    | Purinergic receptor P2X, ligand-gated ion channel, 3                   |              | 9.85E-05  | 0.0073355 | 1.93878  |
| ILMN_194028 | P2ry6    | Pyrimidinergic receptor P2Y, G-protein coupled, 6                      | NM_183168    | 0.0098679 | 0.0560754 | -1.57322 |
| ILMN_213804 | Pafah1b3 | Platelet-activating factor acetylhydrolase, isoform 1b, alpha1 subunit | NM_008776    | 0.0073845 | 0.0492114 | 2.00328  |
| ILMN_188937 | Parp12   | Poly (ADP-ribose) polymerase family, member 12                         | NM_172893    | 0.0012828 | 0.0221491 | -1.5757  |
| ILMN_222572 | Pbk      | PDZ binding kinase                                                     | NM_023209    | 0.0018981 | 0.025677  | 1.52151  |
| ILMN_204318 | Pde4b    | Phosphodiesterase 4B, cAMP specific                                    | NM_001177980 | 0.00327   | 0.0333574 | 1.54506  |

|             |            |                                                                                                                                 |              |           |           |          |
|-------------|------------|---------------------------------------------------------------------------------------------------------------------------------|--------------|-----------|-----------|----------|
| ILMN_213240 | Pdhb       | Pyruvate dehydrogenase (lipoamide) beta                                                                                         | NM_024221    | 0.0136561 | 0.0663767 | -1.56721 |
| ILMN_215714 | Pdia4      | Protein disulfide isomerase associated 4                                                                                        | NM_009787    | 0.0172437 | 0.074634  | -1.56667 |
| ILMN_221690 | Pex7       | Peroxisome biogenesis factor 7                                                                                                  | NM_001161825 | 0.0054328 | 0.0429078 | -1.75748 |
| ILMN_217699 | Phex       | Phosphate regulating gene with homologies to endopeptidases on the X chromosome (hypophosphatemia, vitamin D resistant rickets) | NM_011077    | 0.00316   | 0.0331734 | -2.16559 |
| ILMN_205821 | Phf201     | PHD finger protein 20-like 1                                                                                                    | NM_001081409 | 0.0131881 | 0.0649079 | 1.64219  |
| ILMN_221026 | Pigu       | Phosphatidylinositol glycan anchor biosynthesis, class U                                                                        | NM_001004721 | 0.0240028 | 0.0877682 | -1.73891 |
| ILMN_252909 | Pira11     | Paired-Ig-like receptor A11                                                                                                     | NM_011088    | 0.0222936 | 0.0846412 | -1.58746 |
| ILMN_190986 | Pitpnc1    | Phosphatidylinositol transfer protein, cytoplasmic 1                                                                            | NM_145823    | 0.0016754 | 0.0246734 | -1.59756 |
| ILMN_209036 | Plekha2    | Pleckstrin homology domain-containing, family A (phosphoinositide binding specific) member 2                                    | NM_031257    | 8.02E-06  | 0.0024215 | 1.53333  |
| ILMN_218871 | Plscr1     | Phospholipid scramblase 1                                                                                                       |              | 0.03172   | 0.0999591 | -1.57859 |
| ILMN_217787 | Pou2f2     | POU domain, class 2, transcription factor 2                                                                                     | NM_001163554 | 0.0277193 | 0.0939705 | 1.67584  |
| ILMN_259833 | Ppapdc1b   | POU domain, class 2, transcription factor 2                                                                                     | NM_028000    | 0.0165101 | 0.0733364 | -1.61669 |
| ILMN_190255 | Ppp1r2-ps2 | phosphatidic acid phosphatase type 2 domain containing 1B                                                                       |              | 0.0193442 | 0.0795997 | -1.56913 |
| ILMN_201525 | Ppp2r5a    | Protein phosphatase 2, regulatory subunit B (B56), alpha isoform                                                                | NM_144880    | 0.001172  | 0.0210839 | -1.96481 |
| ILMN_221477 | Ppt1       | Palmitoyl-protein thioesterase 1                                                                                                | NM_008917    | 0.0113871 | 0.0606539 | -1.62544 |
| ILMN_211235 | Prg2       | Proteoglycan 2, bone marrow                                                                                                     | NM_008920    | 0.011848  | 0.0614497 | 3.09238  |
| ILMN_219970 | Prg3       | Proteoglycan 3                                                                                                                  | NM_016914    | 0.0041108 | 0.0374607 | 3.45831  |
| ILMN_238017 | Prm1       | Protamine 1                                                                                                                     | NM_013637    | 0.008427  | 0.0524486 | 1.63486  |
| ILMN_214926 | Prok2      | Prokineticin 2                                                                                                                  | NM_001037539 | 0.0079247 | 0.050991  | -1.70367 |
| ILMN_221097 | Psme2      | Proteasome (prosome, macropain) 28 subunit, beta                                                                                | NM_001029855 | 0.0111785 | 0.0598173 | -1.98849 |
| ILMN_213298 | Pthr1      | Parathyroid hormone receptor 1                                                                                                  |              | 0.0066888 | 0.0470158 | -1.61359 |
| ILMN_215638 | Qrs1       | Glutamyl-tRNA synthase (glutamine-hydrolyzing)-like 1                                                                           | NM_001081054 | 0.0004974 | 0.014327  | 1.52893  |
| ILMN_208686 | Rab14      | RAB14, member RAS oncogene family                                                                                               | NM_026697    | 0.0025166 | 0.0294986 | 1.51368  |
| ILMN_221923 | Rab43      | RAB43, member RAS oncogene family                                                                                               | NM_001039394 | 0.0033183 | 0.0336591 | 1.50099  |
| ILMN_223403 | Rab4a      | RAB4A, member RAS oncogene family                                                                                               | NM_009003    | 0.0004829 | 0.0140661 | 1.52319  |

|             |                |                                                            |              |           |           |          |
|-------------|----------------|------------------------------------------------------------|--------------|-----------|-----------|----------|
| ILMN_214788 | Rab5a          | RAB5A, member RAS oncogene family                          |              | 0.0041854 | 0.0376937 | -2.16852 |
| ILMN_211132 | Rad21          | RAD21 homolog (S. pombe)                                   | NM_009009    | 0.0035862 | 0.034524  | 1.77477  |
| ILMN_238709 | Ralgs2         | Ral GEF with PH domain and SH3 binding motif 2             | NM_001159965 | 0.0061968 | 0.0454376 | 1.51395  |
| ILMN_217907 | Ranbp9         | RAN binding protein 9                                      | NM_019930    | 0.0149435 | 0.0696647 | -2.06805 |
| ILMN_212357 | Rapgef1        | Rap guanine nucleotide exchange factor (GEF)-like 1        | NM_001080925 | 0.0001012 | 0.0073504 | 1.6896   |
| ILMN_188488 | Rcor1          | REST corepressor 1                                         | NM_198023    | 0.0066326 | 0.0468356 | 1.5275   |
| ILMN_217614 | Rdh14          | Retinol dehydrogenase 14 (all-trans and 9-cis)             | NM_023697    | 0.0163562 | 0.0730232 | -1.95301 |
| ILMN_223820 | Reck           | Reversion-inducing-cysteine-rich protein with kazal motifs | NM_016678    | 0.0228243 | 0.0856915 | -1.64384 |
| ILMN_187635 | Refbp2         | RNA and export factor binding protein 2                    |              | 0.0105156 | 0.0580523 | 1.5801   |
| ILMN_209775 | Rexo2          | REX2, RNA exonuclease 2 homolog (S. cerevisiae)            | NM_024233    | 0.0094933 | 0.0553312 | -1.85219 |
| ILMN_216035 | Rhag           | Rhesus blood group-associated A glycoprotein               | NM_011269    | 0.010292  | 0.0574751 | -2.47141 |
| ILMN_218398 | Rhbdl2         | Rhomboid, veinlet-like 2 (Drosophila)                      |              | 0.0262536 | 0.0914872 | 1.65811  |
| ILMN_210173 | Rnase4         | Ribonuclease, RNase A family 4                             | NM_021472    | 0.0180315 | 0.0762383 | -1.77579 |
| ILMN_193392 | Rnf13          | Ring finger protein 13                                     | NM_001113413 | 0.00213   | 0.0272932 | -1.56937 |
| ILMN_210478 | Rnf181         | Ring finger protein 181                                    | NM_025607    | 0.0036503 | 0.0348248 | -1.73567 |
| ILMN_209890 | Rnf4           | Ring finger protein 4                                      | NM_011278    | 0.0238277 | 0.0876028 | -1.99838 |
| ILMN_199705 | Rpl23a-ps5     | ribosomal protein L23A, pseudogene 5                       |              | 0.0028794 | 0.0315185 | 1.5205   |
| ILMN_199029 | Rpl27a-ps1     | ribosomal protein L27A, pseudogene 1                       |              | 0.0297891 | 0.0969119 | -1.5067  |
| ILMN_234979 | Rpl7a          | Ribosomal protein L7a                                      |              | 0.0214875 | 0.0833358 | -4.48113 |
| ILMN_221551 | Rps4y2         | Ribosomal protein S4, Y-linked 2                           |              | 0.0047735 | 0.0400526 | -1.52772 |
| ILMN_201538 | Rps6-ps3       | ribosomal protein S6, pseudogene 3                         |              | 0.0004212 | 0.0131871 | 1.56584  |
| ILMN_214605 | Rsad2          | Radical S-adenosyl methionine domain containing 2          | NM_021384    | 0.0236718 | 0.0873367 | -1.55961 |
| ILMN_187143 | Rsph1          | Radial spoke head 1 homolog (Chlamydomonas)                | NM_025290    | 0.0002537 | 0.0105907 | 1.98919  |
| ILMN_242897 | Rsph9          |                                                            | NM_029338    | 0.0048854 | 0.0405091 | 1.74257  |
| ILMN_186120 | Rtn4           | Reticulon 4                                                | NM_024226    | 0.0001074 | 0.0074684 | -1.60784 |
| ILMN_222481 | Rybp           | RING1 and YY1 binding protein                              | NM_019743    | 0.014437  | 0.0686364 | -2.60731 |
| ILMN_220623 | Sbk            |                                                            |              | 0.0007665 | 0.0170528 | 2.04085  |
| ILMN_219254 | Scara3         | Scavenger receptor class A, member 3                       | NM_172604    | 0.0048667 | 0.0404175 | 1.58523  |
| ILMN_218062 | Scd1           | Stearoyl-Coenzyme A desaturase 1                           | NM_009127    | 0.004605  | 0.0392738 | 2.08244  |
| ILMN_195140 | scl0001905.1_3 |                                                            |              | 5.82E-05  | 0.0060164 | -1.50208 |

|             |                  |                                                                                                   |              |           |           |          |
|-------------|------------------|---------------------------------------------------------------------------------------------------|--------------|-----------|-----------|----------|
| ILMN_188988 | scl0002368.1_75  |                                                                                                   |              | 0.0278538 | 0.0941776 | 1.7254   |
| ILMN_184713 | scl0002624.1_576 |                                                                                                   |              | 0.0172666 | 0.0746648 | -1.5271  |
| ILMN_193137 | scl0002791.1_134 |                                                                                                   |              | 0.0063284 | 0.046056  | -1.88849 |
| ILMN_186828 | scl0003799.1_2   |                                                                                                   |              | 0.0033527 | 0.0337587 | -1.59533 |
| ILMN_188130 | scl0004020.1_31  |                                                                                                   |              | 0.0233432 | 0.08686   | -1.96334 |
| ILMN_190146 | scl000416.1_19   |                                                                                                   |              | 0.0009233 | 0.0187464 | -1.8387  |
| ILMN_222018 | Sdf21            | Stromal cell-derived factor 2-like 1                                                              | NM_022324    | 0.0055293 | 0.0432438 | -1.7551  |
| ILMN_184862 | Sec23a           | SEC23A (S. cerevisiae)                                                                            | NM_009147    | 0.0002349 | 0.010221  | -1.50137 |
| ILMN_219302 | Sec24d           | SEC24 related gene family, member D (S. cerevisiae)                                               | NM_027135    | 0.0043148 | 0.0383344 | -1.51882 |
| ILMN_210845 | Sec61b           | Sec61 beta subunit                                                                                | NM_024171    | 0.0214404 | 0.0833177 | -1.92927 |
| ILMN_209357 | Sep15            | Selenoprotein                                                                                     | NM_053102    | 0.0080448 | 0.0515104 | -2.75    |
| ILMN_214926 | Sfr1             | SWI5 dependent recombination repair 1                                                             | NM_026377    | 0.0123959 | 0.0628877 | -1.70367 |
| ILMN_214616 | Sfrs5            | Splicing factor, arginine/serine-rich 5 (SRp40, HRS)                                              |              | 0.0099869 | 0.0566284 | -2.06117 |
| ILMN_185390 | Slamf6           | SLAM family member 6                                                                              | NM_030710    | 0.0003765 | 0.0125503 | 1.74422  |
| ILMN_207184 | Slc6a4           | Solute carrier family 6 (neurotransmitter transporter, serotonin), member 4                       | NM_010484    | 0.0004806 | 0.0140595 | -1.60042 |
| ILMN_221451 | Smarca4          | SWI/SNF related, matrix associated, actin dependent regulator of chromatin, subfamily a, member 4 | NM_001174078 | 0.0013504 | 0.0224779 | 1.69714  |
| ILMN_228402 | Smek2            | SMEK homolog 2, suppressor of mek1 (Dictyostelium)                                                | NM_134034    | 0.0001986 | 0.0095924 | 1.57482  |
| ILMN_192585 | Snhg10           | Small nucleolar RNA host gene (non-protein coding) 10                                             |              | 0.0125152 | 0.063278  | 1.64758  |
| ILMN_195167 | Snhg5            | small nucleolar RNA host gene 5                                                                   |              | 0.0268278 | 0.092456  | -1.76956 |
| ILMN_201536 | Snn              | Stannin                                                                                           | NM_009223    | 0.0003355 | 0.011862  | 1.80601  |
| ILMN_215357 | Snx29            | sorting nexin 29                                                                                  | NM_028964    | 0.0010338 | 0.0195819 | 1.52172  |
| ILMN_218435 | Snx7             | Sorting nexin 7                                                                                   | NM_001190156 | 0.0101389 | 0.0569625 | -1.56445 |
| ILMN_217542 | Srpk3            | Serine/arginine-rich protein specific kinase 3                                                    | NM_019684    | 0.0144003 | 0.0685342 | 1.81098  |
| ILMN_220427 | Srpr             | Signal recognition particle receptor ('docking protein')                                          | NM_026130    | 0.0040385 | 0.0370317 | -1.51223 |
| ILMN_202257 | Srsf11           |                                                                                                   | NM_001093752 | 0.0098509 | 0.0560576 | 1.75593  |
| ILMN_220254 | Stap1            | Signal transducing adaptor family member 1                                                        | NM_019992    | 0.0101493 | 0.0569625 | -1.72404 |
| ILMN_209686 | Stk25            | Serine/threonine kinase 25 (yeast)                                                                | NM_021537    | 0.0157331 | 0.0715863 | -1.51974 |
| ILMN_218897 | Strbp            | Spermatid perinuclear RNA binding protein                                                         | NM_009261    | 4.19E-06  | 0.0019724 | 2.20538  |
| ILMN_218897 | Strbp            | Spermatid perinuclear RNA binding protein                                                         | NM_009261    | 0.0249048 | 0.0892775 | 1.518    |
| ILMN_203452 | Strn3            | Striatin, calmodulin binding protein 3                                                            | NM_001172098 | 0.0184115 | 0.0774068 | 1.59614  |

|             |           |                                                                                            |              |           |           |          |
|-------------|-----------|--------------------------------------------------------------------------------------------|--------------|-----------|-----------|----------|
| ILMN_210817 | Stt3b     | STT3, subunit of the oligosaccharyltransferase complex, homolog B ( <i>S. cerevisiae</i> ) | NM_024222    | 0.0002992 | 0.0111734 | -1.80257 |
| ILMN_211084 | Stx18     | Syntaxin 18                                                                                | NM_026959    | 0.006823  | 0.0474291 | -1.61668 |
| ILMN_205316 | Stxbp3    |                                                                                            |              | 0.0013624 | 0.0225395 | 1.85091  |
| ILMN_215684 | Sumo3     | SMT3 suppressor of mif two 3 homolog 3 (yeast)                                             | NM_019929    | 0.0081309 | 0.0515811 | -1.8232  |
| ILMN_223539 | Supt16h   | Suppressor of Ty 16 homolog ( <i>S. cerevisiae</i> )                                       | NM_033618    | 0.0032312 | 0.0332897 | 1.95893  |
| ILMN_216821 | Tbc1d10c  | TBC1 domain family, member 10c                                                             | NM_178650    | 0.0003092 | 0.0114222 | 1.62891  |
| ILMN_223469 | Tceal8    | Transcription elongation factor A (SII)-like 8                                             | NM_001168578 | 0.0214734 | 0.0833334 | -1.70603 |
| ILMN_195510 | Tcrb-V8.2 | T-cell receptor beta, variable 8.2                                                         |              | 0.0115473 | 0.0609483 | -1.51557 |
| ILMN_217992 | Tespa1    |                                                                                            | NM_183264    | 0.0004563 | 0.0138285 | 1.63974  |
| ILMN_240795 | Tgfbr3    | Transforming growth factor, beta receptor III                                              | NM_011578    | 0.005437  | 0.0429078 | -1.67127 |
| ILMN_221308 | Tlr2      | Toll-like receptor 2                                                                       | NM_011905    | 0.0162138 | 0.0728477 | -1.52284 |
| ILMN_229771 | Tm6sf1    | Transmembrane 6 superfamily member 1                                                       |              | 0.0084446 | 0.052464  | -1.90134 |
| ILMN_195093 | Tmcc1     | Transmembrane and coiled coil domains 1                                                    | NM_177412    | 0.0146167 | 0.0689365 | 1.59784  |
| ILMN_192442 | TMED1     | Transmembrane emp24 domain containing 1                                                    | NM_010744    | 0.0019799 | 0.0261421 | -1.65425 |
| ILMN_214664 | Tmed3     | Transmembrane emp24 domain containing 3                                                    | NM_025360    | 0.0258168 | 0.0907105 | -1.58051 |
| ILMN_223572 | Tmem100   | Transmembrane protein 100                                                                  | NM_026433    | 0.0278096 | 0.0941026 | -1.52224 |
| ILMN_217129 | Tmem132e  | Transmembrane protein 132E                                                                 | NM_023438    | 0.0016706 | 0.0246369 | 1.63913  |
| ILMN_214193 | Tmem16a   | Transmembrane protein 16A                                                                  |              | 0.0049647 | 0.0409716 | -1.56246 |
| ILMN_184478 | Tmem181a  | transmembrane protein 181A                                                                 | NM_001033178 | 0.0065366 | 0.046494  | 1.63873  |
| ILMN_219321 | Tmem188   | Transmembrane protein 188                                                                  | NM_029074    | 0.0179049 | 0.0760392 | -1.82282 |
| ILMN_216276 | Tmem41a   | Transmembrane protein 41a                                                                  | NM_025693    | 0.0283795 | 0.0948362 | -1.52375 |
| ILMN_184824 | Tmpo      | Thymopoietin                                                                               | NM_001080129 | 0.0192909 | 0.0794829 | -1.86714 |
| ILMN_186905 | Tmprss3   | Transmembrane protease, serine 3                                                           | NM_001163776 | 0.0005989 | 0.0154784 | 1.61252  |
| ILMN_191673 | Tnfrsf13c | Tumor necrosis factor receptor superfamily, member 13c                                     | NM_028075    | 0.0010742 | 0.019883  | 1.79442  |
| ILMN_188500 | Top2b     | Topoisomerase (DNA) II beta                                                                | NM_009409    | 0.0004203 | 0.0131871 | 1.5763   |
| ILMN_217774 | Tra2a     | Transformer 2 alpha homolog ( <i>Drosophila</i> )                                          |              | 0.0070892 | 0.0480706 | 1.57699  |
| ILMN_186732 | Trappc2   | Trafficking protein particle complex 2                                                     | NM_025432    | 0.0050021 | 0.0411744 | -1.53332 |
| ILMN_220866 | Tspo      | Translocator protein                                                                       | NM_009775    | 0.0182756 | 0.0770523 | -1.74744 |
| ILMN_187652 | Tssc8     | Tumor-suppressing subchromosomal transferable fragment 8                                   |              | 0.0110624 | 0.0594951 | 1.72174  |

|             |         |                                                                        |              |           |           |          |
|-------------|---------|------------------------------------------------------------------------|--------------|-----------|-----------|----------|
| ILMN_187427 | Ttc39b  |                                                                        | NM_027238    | 0.0023318 | 0.0286161 | 1.60884  |
| ILMN_255437 | Tuba1a  | Tubulin, alpha 1A                                                      | NM_011653    | 0.0109638 | 0.0593669 | -1.597   |
| ILMN_189979 | Twistnb | TWIST neighbor                                                         | NM_172253    | 0.0034083 | 0.0338347 | 1.66141  |
| ILMN_194776 | Uba5    | tetratricopeptide repeat domain 39B                                    | NM_025692    | 0.0233797 | 0.086919  | -1.50808 |
| ILMN_187391 | Ube2d3  | Ubiquitin-conjugating enzyme E2D 3 (UBC4/5 homolog, yeast)             | NM_025356    | 0.0030532 | 0.0325422 | -2.39363 |
| ILMN_251929 | Ube2f   | Ubiquitin-conjugating enzyme E2F (putative)                            | NM_026454    | 0.0084562 | 0.0524841 | -1.6787  |
| ILMN_214968 | Ubr4    | Ubiquitin protein ligase E3 component n-recogin 4                      | NM_001160319 | 0.0004814 | 0.0140595 | 1.70696  |
| ILMN_217393 | Ufsp2   | UFM1-specific peptidase 2                                              | NM_138668    | 0.0078424 | 0.0506651 | -1.70738 |
| ILMN_186258 | Usp18   | Ubiquitin specific peptidase 18                                        | NM_011909    | 0.0023463 | 0.0286715 | -1.6472  |
| ILMN_203488 | Vdac3   | Voltage-dependent anion channel 3                                      | NM_001198998 | 0.0239823 | 0.0877638 | -2.37979 |
| ILMN_216014 | Vezt    | Vezeatin, adherens junctions transmembrane protein                     | NM_172538    | 0.0069801 | 0.0477834 | 1.52407  |
| ILMN_187199 | Vim     | Vimentin                                                               | NM_011701    | 0.0197761 | 0.0805385 | -2.63284 |
| ILMN_208893 | Wnk1    | WNK lysine deficient protein kinase 1                                  | NM_001185020 | 0.0015358 | 0.0237551 | 1.88875  |
| ILMN_195108 | Wnt4    | Wingless-related MMTV integration site 4                               | NM_009523    | 0.0005839 | 0.0153795 | -1.58662 |
| ILMN_187626 | Xist    | Inactive X specific transcripts                                        |              | 0.0010308 | 0.0195819 | 2.12041  |
| ILMN_230389 | Xlr4a   | X-linked lymphocyte-regulated 4A                                       | NM_001081642 | 0.002544  | 0.0295886 | 1.7184   |
| ILMN_210641 | Xrcc6   | X-ray repair complementing defective repair in Chinese hamster cells 6 | NM_010247    | 0.0006334 | 0.0157679 | 1.66699  |
| ILMN_184863 | Zdhhc21 | Zinc finger, DHHC domain containing 21                                 | NM_026647    | 0.0016392 | 0.0243463 | 1.50674  |
| ILMN_237439 | Zfp157  | Zinc finger protein 157                                                | NM_028130    | 0.0001379 | 0.0081008 | 1.51216  |
| ILMN_223660 | Zfp420  | Zinc finger protein 420                                                | NM_172740    | 0.0097163 | 0.0557808 | 1.64412  |
| ILMN_185725 | Zfp433  | RIKEN cDNA 1700123A16 gene                                             | NM_001243067 | 0.011109  | 0.059567  | -1.75437 |
| ILMN_189126 | Zfp592  | Zinc finger protein 592                                                | NM_178707    | 0.0249414 | 0.0893639 | 1.5634   |
| ILMN_188634 | Zfp943  | zinc finger with KRAB and SCAN domains 3                               | NM_001025373 | 0.0018983 | 0.025677  | 1.57403  |
| ILMN_192808 | Zkscan3 | Zinc finger with KRAB and SCAN domains 3                               | NM_001145778 | 0.0236832 | 0.087348  | 1.50421  |
| ILMN_220011 | Znhit6  | zinc finger, HIT type 6                                                | NM_001081094 | 0.0010126 | 0.0194718 | -1.53588 |
